## 34 Introduction

35 Mitochondria are both the primary source of organismal energy and the major source of cellular  
36 reactive oxygen species (ROS) and oxidative stress during aging (Dai et al., 2014). Aged  
37 cardiac mitochondria are functionally changed in redox balance and are deficient in ATP  
38 production (Lesnefsky et al., 2016). Numerous reported studies have focused on redox stress  
39 and ROS production in aging (Dai et al., 2014). However, in its simplistic form, the free radical  
40 theory of aging has become severely challenged (Perez et al., 2009).

41 While more attention has been placed on mitochondrial electron leak and consequent free  
42 radical generation, proton leak is a highly significant aspect of mitochondrial energetics, as it  
43 accounts for more than 20% of oxygen consumption in the liver (Brand, 2005) and 35% to 50%  
44 of that in muscle in the resting state (Rolfe and Brand, 1996). There are two types of proton leak  
45 in the mitochondria: 1) constitutive, basal proton leak, and 2) inducible, regulated proton leak,  
46 including that mediated by uncoupling proteins (UCPs) (Divakaruni and Brand, 2011). In skeletal  
47 muscle, a majority of basal proton conductance has been attributed to adenine nucleotide  
48 translocase (ANT) (Brand et al., 2005). Although, aging-related increased mitochondrial proton  
49 leak was detected in the mouse heart, kidney and liver by indirect measurement of oxygen  
50 consumption in isolated mitochondria (Harper et al., 1998; Serviddio et al., 2007), direct  
51 evidence of functional impact remains to be further investigated. Moreover, the exact site and  
52 underlying mechanisms responsible for aging-related mitochondrial proton leak are unclear.

53 SS-31 (elamipretide), a tetrapeptide (D-Arg-2',6'-dimethyltyrosine-Lys-Phe-NH<sub>2</sub>), binds to  
54 cardiolipin-containing membranes (Birk et al., 2013) and improves cristae curvature (Szeto,  
55 2014). Prevention of cytochrome *c* peroxidase activity and release has been proposed as its  
56 major basis of activity (Szeto, 2014; Szeto and Birk, 2014). SS-31 is highly effective in  
57 increasing resistance to a broad range of diseases, including heart ischemia reperfusion injury  
58 (Cho et al., 2007; Szeto, 2008), heart failure (Dai et al., 2013), neurodegenerative disease  
59 (Yang et al., 2009) and metabolic syndrome (Anderson et al., 2009). In aged mice, SS-31  
60 ameliorates kidney glomerulopathy (Sweetwyne et al., 2017) and brain oxidative stress (Hao et  
61 al., 2017) and has shown beneficial effects on skeletal muscle performance (Siegel et al., 2013).  
62 We have recently shown that administration of SS-31 to 24 month old mice for 8 weeks  
63 reverses the age-related decline in diastolic function, increasing the E/A from just above 1.0 to  
64 1.22, restoring this parameter 35% towards that of young (5 month old) mice (Chiao et al.,  
65 2020). However how SS-31 benefits and protects aged cardiac cells remains unclear.

66 In this report we investigated the effect and underlying mechanism of action of SS-31 on aged  
67 cardiomyocytes, especially on the mitochondrial proton leak. Using the naturally aged rodent  
68 model we provided direct evidence of increased proton leak as the primary energetic change in  
69 aged mitochondria. We further show that the inner membrane protein ANT1 mediates the  
70 augmented proton entry in the old mitochondria. Most significantly, we demonstrate that SS-31  
71 prevents the excessive proton entry and rejuvenates mitochondrial function through direct  
72 association with ANT1 and stabilization of the ATP synthasome.

## 73 Results

74 **SS-31 alleviates the excessive mitochondrial proton leak in old cardiomyocytes.** To  
75 examine whether SS-31 restores aging mitochondrial function, we applied the Seahorse  
76 mitochondrial stress assay to intact primary cardiomyocytes. The Seahorse Assay revealed  
77 higher mitochondrial basal respiration in cells from old mice than that in young mouse cells (Fig  
78 1A, C); however, the maximal respiratory rate was not significantly different (Fig 1A, D). The

79 increased basal respiration was attributable to a higher proton leak in old cardiomyocytes ( $164 \pm$   
80  $16$  in 24 month vs  $82 \pm 12$  in young, pmol/min/800cells,  $n=7-14$ ,  $p<0.01$ ) (Fig. 1A, B). Although,  
81 SS-31 has only a minor and non-significant effect on young cardiomyocytes (Fig. S1), acute *in*  
82 *vitro* treatment of isolated old cardiomyocytes with SS-31 (100 nM, 1  $\mu$ M, or 10  $\mu$ M for 2 hrs),  
83 caused reduced mitochondrial proton leak (Fig. 1A, B and Fig. S2), shifting their respiratory  
84 pattern to a more youthful state. These results indicate that SS-31 directly protects aging  
85 cardiac energetics through rapid rejuvenation of mitochondrial respiration in cardiomyocytes,  
86 and in particular, by reducing proton leak.

87 **SS-31 restores the resistance to external pH gradient stress in old cardiomyocytes.** The  
88 evaluation of mitochondrial proton leak by Seahorse Assay is indirect, as it is based on the  
89 oxygen consumption rate. Thus, to directly investigate the reduction of mitochondrial proton leak  
90 in old cardiomyocytes by SS-31, we expressed the protein mt-cpYFP, a mitochondrial matrix-  
91 targeted pH indicator (Demaurex and Schwarzlander, 2016; Schwarzlander et al., 2012; Wang  
92 et al., 2016a; Wei-LaPierre et al., 2013) in the rat cardiomyocytes (Fig. S3). Taking advantage  
93 of the pH sensitive character of mt-cpYFP, we developed a novel protocol to evaluate  
94 mitochondrial proton leak by exposing mitochondria to a pH gradient stress in saponin  
95 permeabilized, mt-cpYFP expressing cardiomyocytes (Fig. 2A, B). The drop in mt-cpYFP  
96 488/405 ratio is due to proton leak through the mitochondrial inner membrane into the  
97 mitochondrial matrix. To evaluate the physical properties of the mitochondrial inner membrane  
98 in the absence of mitochondrial activity, we permeabilized the cardiomyocytes in a buffer that  
99 contained no substrates, ATP, or ADP. We found that aging reduced cardiomyocyte  
100 mitochondrial resistance to a proton gradient stress (Fig. 2A, B). More importantly, we found 10  
101  $\mu$ M SS-31 treatment *in vitro* restored cardiomyocyte mitochondrial inner membrane resistance to  
102 the pH gradient stress in the aged cardiomyocytes (Fig. 2A, B). SS-31 treatment largely  
103 prevented the decline in matrix pH of old cells after the external pH was reduced to 5.3 (Fig. 2B,  
104 C) and slowed the rate of cpYFP 488/405 change after pH 6.9 (Fig. 2D, 3C). At pH 4.5 SS-31  
105 continued to enhance resistance to proton permeability in the treated old cells. This is unlikely to  
106 represent a biological benefit at this nonphysiologic pH, but does indicate the substantial  
107 change in physical properties of the inner membrane after interaction with SS-31 (Fig. 2B). To  
108 further evaluate the kinetics of SS-31 effect on mitochondrial proton permeability, we analyzed  
109 cpYFP fluorescence ratios at various times after exposure of the saponin treated  
110 cardiomyocytes to 10  $\mu$ M SS-31. SS-31 protection of on the mitochondrial matrix proton entry  
111 became significant and near maximal after 7-10 minutes of SS-31 treatment (Fig. 2E). We  
112 examined the dose effect of SS-31 on proton permeability and found near-maximal effects at  
113 100 nM SS-31 (Fig. 2F). In summary, this is the first direct evidence that aging increases  
114 mitochondrial inner membrane proton permeability in aged cardiomyocytes and that SS-31  
115 protects cardiomyocytes from this proton leak.

116 **ANT1 inhibitors restore resistance of old cardiomyocytes to proton leak.** In search of the  
117 source of the uncoupled proton leak in the aged cells, we examined possible involvement of  
118 proton leakage through ATPase and mitochondrial uncoupling proteins (UCPs). The ATPase  
119 inhibitor Oligomycin A failed to inhibit the proton leak in pH challenged permeabilized aged cells  
120 (Fig. 3A, B). Levels of UCP2, which is the dominant isoform of UCPs in the heart, do not change  
121 with in age in hearts (Fig. S4). Genipin, an inhibitor of UCP2, showed no effect on the proton  
122 leak in permeabilized aged cells (Fig 3A, B). These results suggest that the ATPase and UCP2  
123 may not be the source of the excess proton leak in the aged hearts.

124 Recently, the inner membrane protein ANT1 (also called AAC) was identified as the major site  
125 of proton leak in mitochondria of multiple tissues (Bertholet et al., 2019), and was shown to  
126 contribute to the majority of the proton leak in muscle cells (Brand et al., 2005). Treatment of old

127 cardiomyocytes with either the ANT1 inhibitor bongkreikic acid (BKA) (Ruprecht et al., 2019) or  
128 carboxyatractyloside (CAT) (Pebay-Peyroula et al., 2003) completely suppressed the excess  
129 proton leak in the Seahorse assay, though unlike SS-31, they also decreased the maximal  
130 respiratory rate and failed to enhance the RCR (Fig 1B, C, E), which is consistent with the effect  
131 seen in the ANT triple knockout model (Karch et al., 2019). We treated permeabilized old  
132 cardiomyocytes with the ANT1 inhibitors and examined the mt-cpYFP response to an external  
133 pH gradient using the protocol described above. BKA suppressed the proton leak in old  
134 cardiomyocytes, evidenced by the preserved 488/405 ratio at pH 5.3 and a slower 488/405 ratio  
135 decrease at pH 6.9 (Fig. 3A, B). Similar inhibition was found with CAT treatment (Fig. 3A, B).  
136 Taken together, these data implicate ANT1 as the major site of proton leak in aging hearts.

137 **SS-31 attenuates the excessive mitochondrial flash (mitoflash) activity of aged**  
138 **cardiomyocytes, while normalizing membrane potential and ROS.** The mitoflash (Feng et  
139 al., 2017; Hou et al., 2014; Shen et al., 2014; Wang et al., 2008; Wang et al., 2016b; Zhang et  
140 al., 2015), is triggered by nanodomain proton influx into the mitochondrial matrix (Wang et al.,  
141 2016c). Thus, we wondered whether the increased proton leak in the old cells triggered  
142 excessive mitoflash activity. We evaluated mitoflash activity in isolated young and old rat  
143 cardiomyocytes using the indicator mt-cpYFP, as established in the previous studies noted  
144 above. The mitochondrial mitoflash activity in the cells from old (26 mo) cardiomyocytes was  
145 higher than that of young (5 mo) cells ( $2.8 \pm 0.3$  in old vs  $1.4 \pm 0.2$ , /1000 $\mu\text{m}^2$ /100s in young  
146 cells, n=28-88, p<0.05). Confirming this, we detected an increase in mitoflash activity in  
147 Langendorff perfused intact aged hearts from mt-cpYFP transgenic mice (Fig. S5). 1 hour  
148 treatment with SS-31 normalized the mitoflash activity in old cells to the young cell level (Fig.  
149 4D). Moreover, the mitochondrial ANT1 inhibitors BKA and CAT showed super-suppression of  
150 the flash activity, reducing this frequency to half of that of young cells (Fig. 4D). These data  
151 support the notion that proton leak from ANT1 triggers the mitoflash in cardiomyocytes and is  
152 responsible for the excess mitoflash activity of old cells. Moreover, the mitochondrial membrane  
153 potential, which is generally lower in old cardiomyocytes (Serviddio et al., 2007), is restored to  
154 youthful levels by SS-31 treatment (Fig. 4E). Also, SS-31 reduced ROS production in the aged  
155 cardiomyocytes (Fig. 4F). Thus, the reduction of mitochondrial proton leak by SS-31 is  
156 accompanied by a more youthful membrane potential and dynamic function (mitoflash), as well  
157 as less oxidative stress.

158 **SS-31 reverses increased mPTP opening in aged cardiomyocytes.** Due to the close link  
159 previously established between the mitoflash and mitochondrial permeability transition pore  
160 (mPTP) opening (Hou et al., 2014), we evaluated mPTP activity by the photon-triggered mPTP  
161 opening protocol (Fig. 5A) (Zorov et al., 2000). Consistent with previous reports in isolated  
162 mitochondria (Hafner et al., 2010), we found that the time to mPTP opening is decreased in  
163 intact old cardiomyocytes (Fig. 5B). SS-31 and the ANT1 inhibitor BKA, which stabilizes the  
164 ANT1 in the m-state open towards the mitochondrial matrix, both protect the aging-increased  
165 mitochondrial mPTP opening rate (Fig. 5B), consistent with previous observations that BKA  
166 prevents the onset of the permeability transition (Halestrap et al., 1997). The ANT1 inhibitor  
167 CAT, which stabilizes ANT1 in the c-state open toward the cytosol, failed to prevent the rapid  
168 opening of the mPTP in old cells (Fig. 5B), consistent with previous observations that it  
169 facilitates mPTP opening (Halestrap et al., 1997). These data indicate that SS-31 decreases  
170 mPTP opening in old cardiomyocytes.

171 **SS-31 associates directly with ANT1 and the ATP synthasome.** To further investigate the  
172 mechanism of SS-31 protection of the proton leak, we used biotinylated SS-31 to evaluate  
173 whether SS-31 directly interacts with the ANT1 protein. Hearts were disrupted by douncing,  
174 after a low speed spin to remove fragments, mitochondria were collected by high speed spin

175 and disrupted in digitonin, to create lipid rafts containing their associated proteins, a protocol  
176 commonly used to prepare mitochondrial supercomplexes (Johnson et al., 2013). This  
177 preparation was incubated with SS-31-biotin or biotin only, followed by incubation with  
178 streptavidin beads. After washing, the bead-bound fraction was eluted with excess SS-31 and  
179 analyzed by Western blotting. Biotin-SS-31 pulled down ANT1, and free SS-31 competed with  
180 the biotin-SS-31 binding to ANT1 (Fig. 6A, B, Fig. S6). Most notably, both BKA and CAT  
181 inhibited binding of biotin-SS-31 to ANT1 (Fig. 6A, B). This competition was observed even at  
182 BKA and CAT concentrations in the tens of nanomolar range (data not shown), which is  
183 consistent with their reported  $K_d$  of binding to ANT1 (Vignais et al., 1976). Biotin-SS-31  
184 pulldown of ANT1 was not inhibited by Genipin or Oligomycin A (Fig. 6A, B). These data  
185 indicate that SS-31 associates closely with the ANT1 protein. Moreover, native gel and ATPase  
186 blot analysis showed that SS-31 stabilized the ATP synthasome, of which ANT1 and ATPase  
187 are critical members (Ko et al., 2003) (Fig. 6D, E). However, SS-31 treatment did not produce a  
188 detectable increase in mitochondrial complex proteins by Coomassie blue staining (Fig. 6C).  
189 Taken together, these data suggest that SS-31 interacts directly with ANT1 and stabilizes the  
190 ATP synthasome in old cardiomyocytes.

## 191 **Discussion:**

192 In this report we have shown direct evidence of increased proton leak in the aged mitochondria  
193 as a primary energetic disturbance and evidence that the increased proton entry in old  
194 cardiomyocytes takes place through ANT1. Moreover, we demonstrated that SS-31 prevents  
195 the proton entry to the mitochondrial matrix and rejuvenates mitochondrial function through  
196 direct interaction with ANT1 and stabilization of the ATP synthasome. During aging, the  
197 pathological augmented and sustained basal proton leak burdens the mitochondrial work load,  
198 resulting in a decline in respiratory efficiency. Blocking this pathological proton leak induced by  
199 aging benefits the mitochondria and the heart (Fig. 7). We suggest that the restoration of aged  
200 mitochondrial function that is conferred by SS-31 is directly attributable to this effect. However,  
201 the resulting enhancement in diastolic function is likely to require downstream changes, as the  
202 functional benefit took up to 8 weeks to reach full effect, and required post-translational  
203 modifications of contractile protein elements (Chiao et al., 2020). It is increasingly recognized  
204 that mitochondrial function, including redox status and energetics, has far-reaching effects,  
205 including epigenetic alterations and post-translational modifications (Olgar et al., 2019).

206 ANT1 appears to mediate the pathological mitochondrial proton leak in the aged mouse heart.  
207 Although an increased mitochondrial proton leak in the aged heart was previously suggested by  
208 indirect oxygen consumption measurement (Serviddio et al., 2007), the site of this augmented  
209 proton leak in aging mitochondria has remained a puzzle. We directly evaluated the proton leak  
210 using the mitochondrial matrix targeted pH indicator (mt-cpYFP) and provide evidence that  
211 implicates ANT1, the ATP/ADP translocator, as responsible for the pathologically increased  
212 proton leak in aged cardiomyocytes. This does not necessarily implicate the ADP/ATP  
213 translocase mechanism itself in the proton leak, as in the unenergetic state in which we  
214 examined the mitochondrial pH resistance, there would be no ADP/ATP transport activity. Our  
215 result is, however, supported by a recent report that proton transport is an integral function of  
216 ANT1 (Bertholet et al., 2019). Because the ANT1 protein level is not increased in the aged heart  
217 (it is, in fact, mildly but significantly decreased, Fig. S3), the aging-augmented proton leak  
218 through ANT1 must be through altered transport activity or conformational change. Both the  
219 inhibitors of BKA (locking ANT1 in m-state (Ruprecht et al., 2019)) and CAT (locking ANT1 in c-  
220 state (Pebay-Peyroula et al., 2003)) suppressed the proton leak in the aged cardiomyocytes,  
221 suggesting that constraining the conformational state in either position, or otherwise blocking  
222 the proton pore reduces ANT1 proton translocation.

223 Most interestingly, for the first time, we showed that a novel drug, SS-31 (elamipretide), now in  
224 clinical trials, prevents the augmented mitochondrial proton leak, rejuvenates mitochondria  
225 function and reverses aging-related cardiac dysfunction. Mechanistically, we found that SS-31  
226 directly interacts with ANT1 and stabilizes formation of the ATP synthasome. This would seem  
227 surprising, given the prior belief that SS-31 affects mitochondria via binding to cardiolipin.  
228 However, the notion that SS-31 prevents the proton leak by direct interaction at the pore  
229 “pocket” of ANT1 is supported by recent observations based on cross-linking “interactome”  
230 mass-spectroscopy that showed that SS-31 is in intimate proximity to two lysine amino acid  
231 residues in the water filled cavity of the ANT1 protein (Chavez et al., 2020). Moreover, the  
232 cross-linking data suggested that this interaction could have structural consequences and may  
233 stabilize the m-state of ANT1 (Chavez et al., 2020). Our observation that both BKA and CAT  
234 blocked the SS-31 interaction with ANT1 suggests that SS-31 interacts with ANT1 independent  
235 of the ANT1 face to m-state (matrix facing) or c-state (cytoplasmic-facing). These results, and  
236 prior evidence of the critical role of ANT1 in mitochondrial health and function (Liu and Chen,  
237 2013) warrant further high resolution structural study of the ANT transporter.

238 It has recently been shown that SS-31 alters surface electrostatic properties of the mitochondrial  
239 inner membrane (Mitchell et al., 2019). The consequences of this effect could include alteration  
240 of the channel ion gating properties of the ANT, including conformational changes secondary to  
241 enhanced supercomplex and ATP synthasome complex stability. SS-31 effects on stabilization  
242 of mitochondrial synthasome (Figure 6) could directly contribute to the enhanced efficiency of  
243 mitochondrial respiration that is seen in muscle of SS-31 treated old animals (Siegel et al.,  
244 2013) and the improvement in performance of humans with primary mitochondrial myopathy  
245 (Karaa et al., 2018).

246 The restoration of membrane potential by SS-31 the old mitochondria (Fig. 4E) can be attributed  
247 to the suppression of proton leak. However, SS-31 also decreased ROS production (Fig. 4F) in  
248 the aged cardiomyocytes. It is unclear if the reduced ROS production is associated with  
249 modification of the ANT1 shown here or through a parallel mechanism. Blocking this  
250 pathological proton leak induced by aging will benefit the mitochondria and the heart. This is not  
251 in conflict with the “uncoupling to survive hypothesis”, which arises from the positive correlations  
252 between increase proton leak, reduced ROS and increased lifespan (Brand, 2000). This  
253 reduced ROS production is interpreted as resulting from decreased electromotive force and  
254 consequent reduced electron leak during transport through the respiratory chain. However, SS-  
255 31 through its interaction with cardiolipin, abundant in the inner membrane, can improve the  
256 efficiency of electron transfer, especially by its known interaction with the heme group of  
257 cytochrome c (Szeto, 2014; Szeto and Birk, 2014), thereby reducing ROS production, even as  
258 the aged mitochondrial membrane potential is increased. Thus, our data support the conclusion  
259 that SS-31 interaction with multiple inner membrane proteins enhances the performance of  
260 multiple facets of respiratory mechanics.

261 In summary, our study reveals that ANT1 is responsible for the elevated proton leak in old  
262 cardiomyocytes and that SS-31 directly interacts with ANT1, preventing the proton leak and  
263 rejuvenating mitochondrial function in the aged cardiomyocytes. The improved mitochondrial  
264 function leads to complex secondary changes to effect enhanced diastolic function in the aged  
265 heart. These findings provide a novel insight for better understanding of the mechanisms of  
266 cardiac aging and establish the novel concept that decreasing the pathological proton leak in  
267 the aging heart restores mitochondrial function, ultimately reversing cardiac dysfunction in  
268 aging.

269 **Methods:**

270 **Animals.** All the animal procedures were approved by the Institutional Animal Care and Use  
271 Committee at the University of Washington and conform to the NIH guidelines (Guide for the  
272 care and use of laboratory animals). Young (4-6 month-old) and aged (24-26 month-old)  
273 C57BL/6 mice (Charles River colony) and F344 rats (25-30 month-old) were obtained from the  
274 National Institute of Aging Rodent Resource. The mt-cpYFP transgenic C57BL/6 mice were  
275 housed until reaching the age described.

276 **Isolation of adult mouse and rat cardiomyocytes.** Single ventricular myocytes were  
277 enzymatically isolated from mouse and rat hearts as described previously (Zhang et al., 2013;  
278 Zhang et al., 2017). The rod shaped cardiomyocytes were collected by allowing cells settle  
279 down and adhere to laminin coated 24 well Seahorse plates for intact cell oxygen consumption  
280 test or to glass coverslips for confocal imaging.

281 **Seahorse Assay.** The XF24e Extracellular Flux Analyzer (Seahorse Bioscience) was used for  
282 measuring oxygen consumption in intact cardiomyocyte, with XF assay medium containing 5  
283 mM glucose and 1 mM pyruvate. Oligomycin A (OA, 2.5  $\mu$ M), carbonyl cyanide-p-  
284 trifluoromethoxyphenylhydrazone (FCCP, 1  $\mu$ M), and antimycin A (AA, 2.5  $\mu$ M) plus 1  $\mu$ M  
285 rotenone (Rot) were added in three sequential injections. The RCR was measured or calculated  
286 by maximal respiration divided by basal respiration.

287 **Confocal imaging.** We used a Zeiss 510 (Zeiss, Germany) or Leica SP8 (Leica, Germany) for  
288 confocal imaging at room temperature. The cells were placed in modified Tyrode's solution (in  
289 mM: 138 NaCl, 0.5 KCl, 20 HEPES, 1.2 MgSO<sub>4</sub>, 1.2 KH<sub>2</sub>PO<sub>4</sub>, 5 Glucose, 1 CaCl<sub>2</sub>, pH 7.4). For  
290 mitochondrial flashes, mt-cpYFP expressing cells were exposed to alternating excitation at 405  
291 and 488 nm and emission collected at >505 nm. Time-lapse 2D images were collected at a rate  
292 of 1 s per frame. For mitochondrial superoxide quantitation, we used the ratio of MitoSOX Red  
293 (5  $\mu$ M, excited at 540 nm with emission collected at > 560 nm) to mitoTracker Green (200 nM,  
294 excited at 488 nm and emission collected at 505-530 nm). For mitochondrial membrane  
295 potential measurement, JC-1 was excited at 488 nm and emission collected at 510-545 nm and  
296 570-650 nm. For photon triggered mPTP opening, the cells were loaded with 120 nM  
297 Tetramethylrhodamine methyl ester (TMRM) and line scanned at 1 Hz as described previously  
298 (Zorov et al., 2000).

299 **Cell permeabilization and pH stress.** Rat cardiomyocytes were cultured with mt-cpYFP  
300 adenovirus (Wang et al., 2016b) for 3 days in M199 medium. After incubation in Ca<sup>2+</sup>-free  
301 Tyrode's solution for 30 min, the medium was changed to a solution of 100 mM potassium  
302 aspartate, 20 mM KCl, 10 mM glutathione, 10 mM KH<sub>2</sub>PO<sub>4</sub>, 0.1 mM EGTA, 8% dextran 40,000,  
303 pH 7.5, with 50  $\mu$ g/ml saponin for 30 s and then maintained in saponin-free internal solution  
304 (Lukyanenko and Gyorke, 1999). The pH of the solution containing the permeabilized cells was  
305 then progressively lowered by addition of HCl in quantities previously titrated to result in pH 7.3,  
306 6.9, 5.3, and 4.5, with 8 min between each step. The permeabilized cells were excited using  
307 same settings as for mt-cpYFP above, but using a time-lapse of 6 s per frame. The ratio of  
308 emission fluorescence at 488 nm from 405 nm excitation indicated the mitochondrial pH change  
309 (Wei-LaPierre et al., 2013) and was normalized to a starting (pH 7.5) arbitrary value of 1.0, so  
310 as to normalize differences due to variability of the intensity of laser excitation and emission  
311 collection between different experiments.

312 **Western blots.** Heart tissue was lysed with RIPA buffer containing a protease inhibitor cocktail  
313 (Chiao et al., 2016). Protein samples were denatured and separated via NuPAGE Bis-Tris gel,  
314 and transferred to PVDF membranes. The blots were probed with primary antibodies: ANT1

315 (Abcam, ab102032, 1:3000), UCP2 (Cell signaling technology, 89326S, 1:2000) followed by  
316 appropriate secondary antibodies.

317 **Biotin-SS-31 pulldown and Blot Analysis.** Hearts were chunked and dounce homogenized in  
318 mitochondrial isolation buffer (MIB, in mM: 300 sucrose, 10 Na-HEPES, 0.200 EDTA, pH 7.4)  
319 and centrifuged at 800 g for 10 min. The supernatants were centrifuged at 8000 g for 15 min to  
320 purify mitochondria. Digitonin was added to the mitochondria at a ratio of Digitonin : protein = 6  
321 :1 to break down the membrane system. Treatment drugs were added 30 min before addition of  
322 10  $\mu$ M biotin-SS-31 (Biotin-D-Arg-dimethyl Tyr-Lys-Phe-NH<sub>2</sub>) or biotin control (Thermo,  
323 B20656). Streptavidin Agarose beads (Thermo, 20349) were added and incubated 2 hr at room  
324 temperature. The beads were washed with MIB 3 times and then eluted by 50  $\mu$ M SS-31. The  
325 eluates were boiled with LDS protein loading buffer (Thermo, NP0008) and loaded on NuPAGE  
326 for gel electrophoresis and Western blotting with antibody to ANT1 (Abcam, ab102032, 1:3000).  
327 In some experiments, after electrophoresis, gels were silver stained using a Pierce Silver Stain  
328 Kit (Thermo, #24612).

329 **Native coomassie blue staining and blotting.** Mitochondria from mouse hearts were isolated  
330 as described previously (Marcu et al., 2012). Mitochondria (100  $\mu$ g) were solubilized in 4x  
331 NativePAGE Sample Buffer containing 5% digitonin and 5% coomassie blue G-250. The  
332 samples were loaded on NativePAGE Novex 3-12% Gel and run at 100 V for 1 hr, then at 300 V  
333 for 2 hr. For coomassie blue staining, gels were stained with 0.1 % Coomassie Brilliant Blue  
334 overnight and destained with destaining solution (H<sub>2</sub>O: Methanol: Acetic Acid = 5:4:1) 5 times at  
335 20 min intervals. For native blotting, gels were transferred to PVDF membranes at 25 V in 4 °C  
336 overnight and incubated with ATP5a antibody (Abcam, ab14748, 1:3000), followed by anti-  
337 mouse secondary antibody.

338 **Perfused mouse heart confocal imaging.** mt-cpYFP transgenic mice were anesthetized with  
339 pentobarbital (150mg/kg). The heart was removed, cannulated via the ascending aorta, and put  
340 on a modified perfusion system and in a custom made chamber on the confocal stage as  
341 previously reported (Zhang et al., 2018; Zhang et al., 2017). The perfusion was maintained  
342 under a constant flow ( ~2 mL/min) with O<sub>2</sub>/CO<sub>2</sub>-bubbled KHB solution (in mM: 118 NaCl, 0.5  
343 EDTA, 10 D-glucose, 5.3 KCl, 1.2 MgCl<sub>2</sub>, 25 NaHCO<sub>3</sub>, 0.5 Pyruvate, and 2 CaCl<sub>2</sub>, pH 7.4) at 37  
344 °C. To minimize motion artifact during imaging, 10  $\mu$ M (-)-Blebbistatin (Toronto Research  
345 Chemicals) was included. During imaging, the left ventricle was gently pressed to further  
346 suppress motion artifact. Mitoflashes were imaged using the procedure described above.

#### 347 **Data statistics.**

348 Data are shown as mean  $\pm$  SEM. Student's t-test was applied to determine the statistical  
349 significance. P < 0.05 was considered statistically significant.

#### 350 **Conflict of interest**

351 Dr. Szeto Hazel has served as consultants to Stealth Biotherapeutics.

#### 352 **Acknowledgements**

353 We thank Drs. Mariya Sweetwyne, Ying Ann Chiao, Martin Brand, Michael MacCoss and  
354 Gaomin Feng for technical support and helpful discussions and the services of the W. M. Keck  
355 Microscopy Center at the University of Washington. SS-31 (elamipretide) was kindly provided by  
356 Stealth Biotherapeutics (Newton MA).



357 This work was supported by NIA P01AG001751 and R56AG055114 to P.S.R., HL114760,  
358 HL137266 and AHA 18EIA33900041 to W. W, and a Glenn Foundation for Medical Research  
359 Postdoctoral Fellowship and AHA 19CDA34660311 to H.Z.

360 Author contributions: Conceptualization and experimental design: H Zhang, N.N Alder and P.S.  
361 Rabinovitch; investigation, analysis, and visualization: H Zhang; writing of the original draft: H  
362 Zhang, P.S. Rabinovitch; review and editing of the draft: N.N Alder, W Wang, H Szeto, D. J.  
363 Marcinek.

## 364 **Figure Legends**

365 Fig. 1: SS-31 alleviates the excessive mitochondrial proton leak of cardiomyocytes from 24 mo  
366 old mice. (A) Representative Seahorse Assay traces of cardiomyocytes isolated from untreated  
367 young and old mice, then exposed or not to 100nM SS-31 for 2 hr in vitro. Aging increased  
368 basal respiration (C), which was attributable to the augmentation of proton leak (B), but did not  
369 affect maximal respiration (D). ANT1 inhibitors BKA (10  $\mu$ M) and CAT (20  $\mu$ M) 2 hr treatment  
370 decreased the proton leak (B) and basal respiration (C) but also decreased maximal respiration  
371 (D) in old cardiomyocytes. N=5-14 mice in each group; Student's t-test was applied to determine  
372 the statistical significance. \*P < 0.05, \*\*P < 0.01 vs. young; #P < 0.05, ###P < 0.01 vs. old  
373 controls.

374

375 Fig. 2: SS-31 restores the resistance of cardiomyocytes from old rat to proton entry into the  
376 mitochondrial matrix during external pH gradient stress. (A) Typical image of the effects of pH  
377 gradient stress on permeabilized rat cardiomyocyte mt-cpYFP fluorescence. Up panel, Young,  
378 middle panel, Old, lower panel, Old+SS31 (10  $\mu$ M, 3 days) visualized after exposure of the cells  
379 to pH 7.5 and, later, to pH 5.3. The excitation is 488 nm and collection is at 505-730nm. (B)  
380 saponin (50  $\mu$ g/ml) permeabilized cardiomyocytes expressing mt-cpYFP were exposed to  
381 progressively lower external pH. Proton permeability of old mitochondria was greater than that  
382 of young mitochondria, but preincubation of old cells with 10  $\mu$ M SS-31 for 3 days enhanced the  
383 mitochondrial inner membrane resistance to the pH stress. The traces were averaged from 4-19  
384 experiments. The arrows indicate the changes of pH. (C) Quantitation of the SS-31 treatment  
385 effect on the mitochondrial matrix cpYFP ratio at pH 5.3. The data are from 7-8 min after the pH  
386 was adjusted to 5.3. N=5-19 rats in each group. (D) SS-31 decreased the rate of cpYFP  
387 488/405 ratio drop at pH 6.9. N=4-10 rats in each group. The rate is calculated as indicated in  
388 Figure 3C. The time dependence (N=3-4 rats in each group) (E) and dose dependence (N=3-14  
389 rats in each group) (F) of SS-31 protection of mitochondrial resistance to pH gradient stress are  
390 shown. After cardiomyocyte permeabilization, 10  $\mu$ M SS-31 was added for the times shown in  
391 (E) or at the doses shown in (F) for 30 minutes, followed by pH stress. \* P < 0.05, \*\*P < 0.01 vs  
392 Young; # P < 0.05, ###P < 0.01 vs Old.

393

394 Fig. 3: ANT1 inhibitors restore resistance to proton leak in old rat cardiomyocytes. ANT1  
395 inhibitors 10  $\mu$ M BKA and 20  $\mu$ M CAT, but not 50  $\mu$ M Genipin (UCP2 inhibitor) or 1  $\mu$ M OA  
396 (ATPase inhibitor), protected the mitochondrial matrix from decreased pH after exposure to  
397 external pH 5.3 (N=4-19 rats in each group) (A) and reduced the rate of 488/405 decline after  
398 exposure to pH 6.9 (N=4-10 rats in each group) (B). BKA, CAT, Genipin, or OA were added  
399 immediately after the mitochondria permeabilization. \*P < 0.05, \*\*P < 0.01 vs Young, #P < 0.05,  
400 ###P < 0.01 vs Old. (C) Method of quantitation of the slope of mt-cpYFP fluorescence ratio  
401 change after permeabilized cells are exposed to external pH 6.9. The trace is from old rat  
402 cardiomyocytes.

403

404 Fig. 4: SS-31 attenuates excessive mitoflash activity in aged rat cardiomyocytes. (A-C) Mitoflash  
405 events within the regions shown in the red boxes took place at the times shown by vertical bars  
406 during the 100 sec scanning time in the representative cardiomyocytes from young (A), old (B)  
407 and old+SS-31 (C) rat hearts. (D) The rate of mitoflash activity was increased in old rat  
408 cardiomyocytes compared to young, but 1 hour SS-31, BKA (10  $\mu$ M) and CAT (20  $\mu$ M)  
409 treatments decreased the mitoflash frequency in old cells to or below that of young cells. N =  
410 26-87 cells from 3-14 rats. \*\*P < 0.05 vs young. ##P < 0.05 vs old. (E) JC-1 red to green  
411 fluorescence ratio, indicative of mitochondrial membrane potential, in cells from young and old  
412 mice and old mouse cardiomyocytes treated with SS-31 (10  $\mu$ M for 12 hours). N= 84-218 cells  
413 from 3-4 mice. P = 0.06 vs young. ##P < 0.01 vs old. (F) Mitochondrial ROS production in  
414 mouse cardiomyocytes measured by the fluorescence ratio of MitoSOX (5  $\mu$ M, excitation 540  
415 nm, emission >560 nm) to Mitotracker green (200 nM, excitation 488 nm, emission 505-530  
416 nm). N=40-84 cells from 3-5 mice. \*\*P < 0.05 vs young. ##P < 0.05 vs old.

417

418 Fig. 5: SS-31 reverses the increased speed of mPTP opening in aged mouse cardiomyocytes.  
419 (A) A typical image shows 1 Hz line-scanning photo-excitation induced mPTP opening in a  
420 cardiomyocyte loaded with the mitochondrial membrane potential ( $\Delta\psi_m$ ) dye TMRM. The  
421 sudden decline of TMRM fluorescence with time (rightward) indicates mPTP opening and  $\Delta\psi_m$   
422 loss. (B) 1-hour SS-31 and BKA, but not CAT treatments protect the photo-excitation induced  
423 mPTP opening. Quantification of time to mPTP opening from 418-658 mitochondria from 19-32  
424 cells isolated from 3-4 mice in each group. \*\*P < 0.01 vs young, ##P < 0.01 vs old.

425

426 Fig. 6: SS-31 interacts with ANT1 and stabilizes the ATP synthasome in the old mouse heart  
427 mitochondria. (A, B) Biotin-SS-31 pulldown shows the association of biotin-SS-31 to ANT1. Free  
428 SS-31 competes with this interaction, while BKA and CAT inhibit the interaction of biotin-SS-31  
429 with ANT1. Panel A shows a representative Western blot. N=6 mice in each group. \*\*P < 0.01  
430 vs Biotin control, #P < 0.05, ##P < 0.01 vs Biotin-SS31 pulldown. (C) Coomassie blue staining  
431 of isolated mitochondria in a native gel. (D) Left panel is the total protein loading control for the  
432 Native gel blot. (D, E) Native Gel blotting shows that 10  $\mu$ M SS-31 stabilizes the mitochondrial  
433 synthasome (Syn) in isolated mitochondria. The Syn is highlighted in the red box. The Syn and  
434 ATPase Dimer (D) and Monomer (M) were labeled using anti-ATP5A. N=6 mice in each group.  
435 \*P < 0.05 vs young, #P < 0.05 vs old.

436

437 Fig. 7: Schematic of the mechanism of SS-31 protection of proton leak and rejuvenation of  
438 mitochondrial function. Due to increased mitochondrial proton leak, the mitochondria work  
439 harder to maintain ATP production, and thus the work load is increased in the aged heart.

440

441 Supplemental Fig. 1: SS-31 has a minor effect on mitochondrial respiration in the young  
442 cardiomyocytes. None of the differences are significant. N=5 mice in each group.

443

444 Supplemental Fig. 2: SS-31 reaches its inhibitory effect on proton leak suppression at low  
445 concentrations. SS-31 decreased the mitochondrial proton leak. N=6-14 mice in each group \*\*P  
446 < 0.01 vs. young, #P < 0.05 vs. old controls.

447

448 Supplemental Fig. 3: pH calibration of mt-cpYFP in adult cardiac myocytes with Nigericin. 10  $\mu$ M  
449 Nigericin was added to the mitochondrial permeabilization buffer. (A) shows the ratio of 488/405  
450 (normalized to that of the value at pH=7.5) as the pH is gradually lowered. The ratio of 488/405  
451 reaches the lowest point at pH 6.0, followed by a small increase starting at pH 5.5, consistent  
452 with the known pH response of this dye (Wei-LaPierre et al., 2013). (B) shows the emission  
453 spectra of mt-cpYFP pH 8.0, 6.0 and 4.5 when excited at 488 nM (C) shows the emission  
454 spectra of mt-cpYFP pH 8.0, 6.0 and 4.5 when excited at 405nm. The 488 nm excitation is  
455 sensitive to the pH change but the 405 nm excitation is much less pH dependent.

456

457 Supplemental Fig. 4: Aging effect on ANT1 and UCP2 cardiac protein abundance. Aging  
458 slightly, but significantly decreases ANT1 levels in the mice heart. Western blot of ANT1 (A, C)  
459 and UCP2 (B, D). N=6 mice in each group. \*P < 0.05 vs young. The total protein loading control  
460 was stained with MemCode Reversible Protein Stain Kit for Polyvinylidene difluoride  
461 Membranes (Pierce, Rockford, IL).

462

463 Supplemental Fig. 5: Increased mitochondrial flash activity in the intact perfused mouse aged  
464 heart. (A) Typical images from the young (upper panel) and old (lower panel) mice hearts. (B)  
465 Statistical analysis of mitoflash frequency in the analyzed regions indicated by the red boxes in  
466 panel A. Young: N=18 regions from 3 mice. Old: N=16 regions from 4 mice. \*P < 0.05 vs Young.

467

468 Supplemental Fig. 6: Silver staining of the Biotin-SS-31 pulldown of Figure 6A from the old  
469 mouse heart mitochondria. The great majority of bands present in the input are not present in  
470 the biotin-SS-31 pulldown; those that are show suppression by SS-31 competition.

471

## 472 Reference

473 Anderson, E.J., Lustig, M.E., Boyle, K.E., Woodlief, T.L., Kane, D.A., Lin, C.T., Price, J.W., 3rd, Kang, L.,  
474 Rabinovitch, P.S., Szeto, H.H., et al. (2009). Mitochondrial H<sub>2</sub>O<sub>2</sub> emission and cellular redox state link  
475 excess fat intake to insulin resistance in both rodents and humans. *J Clin Invest* 119, 573-581.  
476 Bertholet, A.M., Chouchani, E.T., Kazak, L., Angelin, A., Fedorenko, A., Long, J.Z., Vidoni, S., Garrity, R.,  
477 Cho, J., Terada, N., et al. (2019). H(+) transport is an integral function of the mitochondrial ADP/ATP  
478 carrier. *Nature* 571, 515-520.  
479 Birk, A.V., Liu, S., Soong, Y., Mills, W., Singh, P., Warren, J.D., Seshan, S.V., Pardee, J.D., and Szeto, H.H.  
480 (2013). The mitochondrial-targeted compound SS-31 re-energizes ischemic mitochondria by interacting  
481 with cardiolipin. *J Am Soc Nephrol* 24, 1250-1261.  
482 Brand, M.D. (2000). Uncoupling to survive? The role of mitochondrial inefficiency in ageing. *Exp*  
483 *Gerontol* 35, 811-820.  
484 Brand, M.D. (2005). The efficiency and plasticity of mitochondrial energy transduction. *Biochem Soc*  
485 *Trans* 33, 897-904.  
486 Brand, M.D., Pakay, J.L., Ocloo, A., Kokoszka, J., Wallace, D.C., Brookes, P.S., and Cornwall, E.J. (2005).  
487 The basal proton conductance of mitochondria depends on adenine nucleotide translocase content.  
488 *Biochem J* 392, 353-362.  
489 Chavez, J.D., Tang, X., Campbell, M.D., Reyes, G., Kramer, P.A., Stuppard, R., Keller, A., Zhang, H.,  
490 Rabinovitch, P.S., Marcinek, D.J., et al. (2020). Mitochondrial protein interaction landscape of SS-31.  
491 *Proc Natl Acad Sci U S A*.

492 Chiao, Y.A., Kolwicz, S.C., Basisty, N., Gagnidze, A., Zhang, J., Gu, H., Djukovic, D., Beyer, R.P., Raftery, D.,  
493 MacCoss, M., et al. (2016). Rapamycin transiently induces mitochondrial remodeling to reprogram  
494 energy metabolism in old hearts. *Aging (Albany NY)* 8, 314-327.

495 Chiao, Y.A., Zhang, H., Sweetwyne, M., Whitson, J., Ting, Y.S., Basisty, N., Pino, L., Quarles, E., Nguyen,  
496 N.H., Campbell, M., et al. (2020). Late-life restoration of mitochondrial function reverses cardiac  
497 dysfunction in old mice. *BioRxiv* <https://doi.org/10.1101/2020.01.02.893008> *eLife*, *inpress*.

498 Cho, J., Won, K., Wu, D., Soong, Y., Liu, S., Szeto, H.H., and Hong, M.K. (2007). Potent mitochondria-  
499 targeted peptides reduce myocardial infarction in rats. *Coron Artery Dis* 18, 215-220.

500 Dai, D.F., Chiao, Y.A., Marcinek, D.J., Szeto, H.H., and Rabinovitch, P.S. (2014). Mitochondrial oxidative  
501 stress in aging and healthspan. *Longev Healthspan* 3, 6.

502 Dai, D.F., Hsieh, E.J., Chen, T., Menendez, L.G., Basisty, N.B., Tsai, L., Beyer, R.P., Crispin, D.A., Shulman,  
503 N.J., Szeto, H.H., et al. (2013). Global proteomics and pathway analysis of pressure-overload-induced  
504 heart failure and its attenuation by mitochondrial-targeted peptides. *Circ Heart Fail* 6, 1067-1076.

505 Demarex, N., and Schwarlander, M. (2016). Mitochondrial Flashes: Dump Superoxide and Dance with  
506 Protons Now. *Antioxid Redox Signal* 25, 550-551.

507 Divakaruni, A.S., and Brand, M.D. (2011). The regulation and physiology of mitochondrial proton leak.  
508 *Physiology (Bethesda)* 26, 192-205.

509 Feng, G., Liu, B., Hou, T., Wang, X., and Cheng, H. (2017). Mitochondrial Flashes: Elemental Signaling  
510 Events in Eukaryotic Cells. *Handb Exp Pharmacol* 240, 403-422.

511 Hafner, A.V., Dai, J., Gomes, A.P., Xiao, C.Y., Palmeira, C.M., Rosenzweig, A., and Sinclair, D.A. (2010).  
512 Regulation of the mPTP by SIRT3-mediated deacetylation of CypD at lysine 166 suppresses age-related  
513 cardiac hypertrophy. *Aging (Albany NY)* 2, 914-923.

514 Halestrap, A.P., Woodfield, K.Y., and Connern, C.P. (1997). Oxidative stress, thiol reagents, and  
515 membrane potential modulate the mitochondrial permeability transition by affecting nucleotide binding  
516 to the adenine nucleotide translocase. *J Biol Chem* 272, 3346-3354.

517 Hao, Z.H., Huang, Y., Wang, M.R., Huo, T.T., Jia, Q., Feng, R.F., Fan, P., and Wang, J.H. (2017). SS31  
518 ameliorates age-related activation of NF-kappaB signaling in senile mice model, SAMP8. *Oncotarget* 8,  
519 1983-1992.

520 Harper, M.E., Monemdjou, S., Ramsey, J.J., and Weindruch, R. (1998). Age-related increase in  
521 mitochondrial proton leak and decrease in ATP turnover reactions in mouse hepatocytes. *Am J Physiol*  
522 275, E197-206.

523 Hou, T., Wang, X., Ma, Q., and Cheng, H. (2014). Mitochondrial flashes: new insights into mitochondrial  
524 ROS signalling and beyond. *J Physiol* 592, 3703-3713.

525 Johnson, S.C., Yanos, M.E., Kayser, E.B., Quintana, A., Sangesland, M., Castanza, A., Uhde, L., Hui, J.,  
526 Wall, V.Z., Gagnidze, A., et al. (2013). mTOR inhibition alleviates mitochondrial disease in a mouse model  
527 of Leigh syndrome. *Science* 342, 1524-1528.

528 Karaa, A., Haas, R., Goldstein, A., Vockley, J., Weaver, W.D., and Cohen, B.H. (2018). Randomized dose-  
529 escalation trial of elamipretide in adults with primary mitochondrial myopathy. *Neurology* 90, e1212-  
530 e1221.

531 Karch, J., Bround, M.J., Khalil, H., Sargent, M.A., Latchman, N., Terada, N., Peixoto, P.M., and Molkentin,  
532 J.D. (2019). Inhibition of mitochondrial permeability transition by deletion of the ANT family and CypD.  
533 *Sci Adv* 5, eaaw4597.

534 Ko, Y.H., Delannoy, M., Hullihen, J., Chiu, W., and Pedersen, P.L. (2003). Mitochondrial ATP synthasome.  
535 Cristae-enriched membranes and a multiwell detergent screening assay yield dispersed single complexes  
536 containing the ATP synthase and carriers for Pi and ADP/ATP. *J Biol Chem* 278, 12305-12309.

537 Lesnefsky, E.J., Chen, Q., and Hoppel, C.L. (2016). Mitochondrial Metabolism in Aging Heart. *Circ Res*  
538 118, 1593-1611.

539 Liu, Y., and Chen, X.J. (2013). Adenine nucleotide translocase, mitochondrial stress, and degenerative  
540 cell death. *Oxid Med Cell Longev* 2013, 146860.

541 Lukyanenko, V., and Gyorke, S. (1999). Ca<sup>2+</sup> sparks and Ca<sup>2+</sup> waves in saponin-permeabilized rat  
542 ventricular myocytes. *J Physiol* 521 Pt 3, 575-585.

543 Marcu, R., Neeley, C.K., Karamanlidis, G., and Hawkins, B.J. (2012). Multi-parameter measurement of the  
544 permeability transition pore opening in isolated mouse heart mitochondria. *J Vis Exp*.

545 Mitchell, W., Ng, E.A., Tamucci, J.D., Boyd, K., Sathappa, M., Coscia, A., Pan, M., Han, X., Eddy, N.A., May,  
546 E.R., et al. (2019). Molecular Mechanism of Action of Mitochondrial Therapeutic SS-31 (Elamipretide):  
547 Membrane Interactions and Effects on Surface Electrostatics. *BioRxiv* <https://doi.org/10.1101/735001>

548 Olgar, Y., Tuncay, E., and Turan, B. (2019). Mitochondria-Targeting Antioxidant Provides  
549 Cardioprotection through Regulation of Cytosolic and Mitochondrial Zn(2+) Levels with Re-Distribution  
550 of Zn(2+)-Transporters in Aged Rat Cardiomyocytes. *Int J Mol Sci* 20.

551 Pebay-Peyroula, E., Dahout-Gonzalez, C., Kahn, R., Trezeguet, V., Lauquin, G.J., and Brandolin, G. (2003).  
552 Structure of mitochondrial ADP/ATP carrier in complex with carboxyatractyloside. *Nature* 426, 39-44.

553 Perez, V.I., Bokov, A., Van Remmen, H., Mele, J., Ran, Q., Ikeno, Y., and Richardson, A. (2009). Is the  
554 oxidative stress theory of aging dead? *Biochim Biophys Acta* 1790, 1005-1014.

555 Rolfe, D.F., and Brand, M.D. (1996). Contribution of mitochondrial proton leak to skeletal muscle  
556 respiration and to standard metabolic rate. *Am J Physiol* 271, C1380-1389.

557 Ruprecht, J.J., King, M.S., Zogg, T., Aleksandrova, A.A., Pardon, E., Crichton, P.G., Steyaert, J., and Kunji,  
558 E.R.S. (2019). The Molecular Mechanism of Transport by the Mitochondrial ADP/ATP Carrier. *Cell* 176,  
559 435-447 e415.

560 Schwarzlander, M., Murphy, M.P., Duchen, M.R., Logan, D.C., Fricker, M.D., Halestrap, A.P., Muller, F.L.,  
561 Rizzuto, R., Dick, T.P., Meyer, A.J., et al. (2012). Mitochondrial 'flashes': a radical concept rePhined.  
562 *Trends Cell Biol* 22, 503-508.

563 Serviddio, G., Bellanti, F., Romano, A.D., Tamborra, R., Rollo, T., Altomare, E., and Vendemiale, G. (2007).  
564 Bioenergetics in aging: mitochondrial proton leak in aging rat liver, kidney and heart. *Redox Rep* 12, 91-  
565 95.

566 Shen, E.Z., Song, C.Q., Lin, Y., Zhang, W.H., Su, P.F., Liu, W.Y., Zhang, P., Xu, J., Lin, N., Zhan, C., et al.  
567 (2014). Mitoflash frequency in early adulthood predicts lifespan in *Caenorhabditis elegans*. *Nature* 508,  
568 128-132.

569 Siegel, M.P., Kruse, S.E., Percival, J.M., Goh, J., White, C.C., Hopkins, H.C., Kavanagh, T.J., Szeto, H.H.,  
570 Rabinovitch, P.S., and Marcinek, D.J. (2013). Mitochondrial-targeted peptide rapidly improves  
571 mitochondrial energetics and skeletal muscle performance in aged mice. *Aging Cell* 12, 763-771.

572 Sweetwyne, M.T., Pippin, J.W., Eng, D.G., Hudkins, K.L., Chiao, Y.A., Campbell, M.D., Marcinek, D.J.,  
573 Alpers, C.E., Szeto, H.H., Rabinovitch, P.S., et al. (2017). The mitochondrial-targeted peptide, SS-31,  
574 improves glomerular architecture in mice of advanced age. *Kidney Int* 91, 1126-1145.

575 Szeto, H.H. (2008). Mitochondria-targeted cytoprotective peptides for ischemia-reperfusion injury.  
576 *Antioxid Redox Signal* 10, 601-619.

577 Szeto, H.H. (2014). First-in-class cardiolipin-protective compound as a therapeutic agent to restore  
578 mitochondrial bioenergetics. *Br J Pharmacol* 171, 2029-2050.

579 Szeto, H.H., and Birk, A.V. (2014). Serendipity and the discovery of novel compounds that restore  
580 mitochondrial plasticity. *Clin Pharmacol Ther* 96, 672-683.

581 Vignais, P.V., Douce, R., Lauquin, G.J., and Vignais, P.M. (1976). Binding of radioactively labeled  
582 carboxyatractyloside, atractyloside and bongkreic acid to the ADP translocator of potato mitochondria.  
583 *Biochim Biophys Acta* 440, 688-696.

584 Wang, W., Fang, H., Groom, L., Cheng, A., Zhang, W., Liu, J., Wang, X., Li, K., Han, P., Zheng, M., et al.  
585 (2008). Superoxide flashes in single mitochondria. *Cell* 134, 279-290.

586 Wang, W., Gong, G., Wang, X., Wei-LaPierre, L., Cheng, H., Dirksen, R., and Sheu, S.S. (2016a).  
587 Mitochondrial Flash: Integrative Reactive Oxygen Species and pH Signals in Cell and Organelle Biology.  
588 *Antioxid Redox Signal* *25*, 534-549.

589 Wang, W., Zhang, H., and Cheng, H. (2016b). Mitochondrial flashes: From indicator characterization to in  
590 vivo imaging. *Methods* *109*, 12-20.

591 Wang, X., Zhang, X., Huang, Z., Wu, D., Liu, B., Zhang, R., Yin, R., Hou, T., Jian, C., Xu, J., et al. (2016c).  
592 Protons Trigger Mitochondrial Flashes. *Biophys J* *111*, 386-394.

593 Wei-LaPierre, L., Gong, G., Gerstner, B.J., Ducreux, S., Yule, D.I., Pouvreau, S., Wang, X., Sheu, S.S.,  
594 Cheng, H., Dirksen, R.T., et al. (2013). Respective contribution of mitochondrial superoxide and pH to  
595 mitochondria-targeted circularly permuted yellow fluorescent protein (mt-cpYFP) flash activity. *J Biol*  
596 *Chem* *288*, 10567-10577.

597 Yang, L., Zhao, K., Calingasan, N.Y., Luo, G., Szeto, H.H., and Beal, M.F. (2009). Mitochondria targeted  
598 peptides protect against 1-methyl-4-phenyl-1,2,3,6-tetrahydropyridine neurotoxicity. *Antioxid Redox*  
599 *Signal* *11*, 2095-2104.

600 Zhang, H., Gong, G., Wang, P., Zhang, Z., Kolwicz, S.C., Rabinovitch, P.S., Tian, R., and Wang, W. (2018).  
601 Heart specific knockout of *Ndufs4* ameliorates ischemia reperfusion injury. *J Mol Cell Cardiol* *123*, 38-45.

602 Zhang, H., Shang, W., Zhang, X., Gu, J., Wang, X., Zheng, M., Wang, Y., Zhou, Z., Cao, J.M., Ji, G., et al.  
603 (2013). Beta-adrenergic-stimulated L-type channel  $Ca(2)^+$  entry mediates hypoxic  $Ca(2)^+$  overload in  
604 intact heart. *J Mol Cell Cardiol* *65*, 51-58.

605 Zhang, H., Wang, P., Bisetto, S., Yoon, Y., Chen, Q., Sheu, S.S., and Wang, W. (2017). A novel fission-  
606 independent role of dynamin-related protein 1 in cardiac mitochondrial respiration. *Cardiovasc Res* *113*,  
607 160-170.

608 Zhang, M., Sun, T., Jian, C., Lei, L., Han, P., Lv, Q., Yang, R., Zhou, X., Xu, J., Hu, Y., et al. (2015).  
609 Remodeling of Mitochondrial Flashes in Muscular Development and Dystrophy in Zebrafish. *PLoS One*  
610 *10*, e0132567.

611 Zorov, D.B., Filburn, C.R., Klotz, L.O., Zweier, J.L., and Sollott, S.J. (2000). Reactive oxygen species (ROS)-  
612 induced ROS release: a new phenomenon accompanying induction of the mitochondrial permeability  
613 transition in cardiac myocytes. *J Exp Med* *192*, 1001-1014.

614

615

Fig. 1: SS-31 alleviates the excessive mitochondrial proton leak in the old cardiomyocytes.

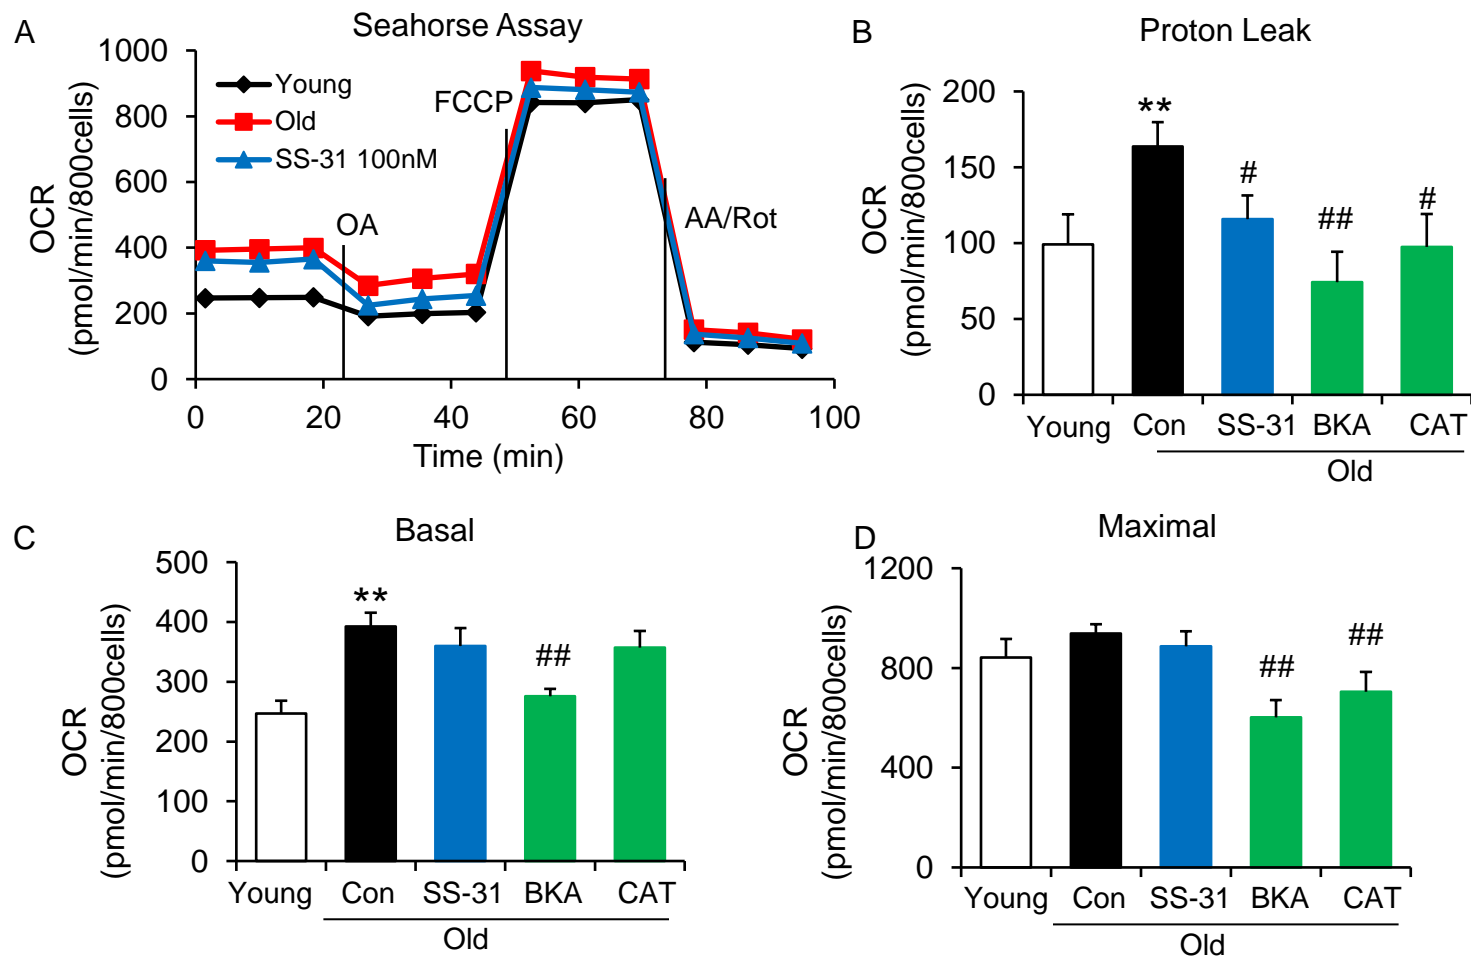

Fig. 2: SS31 restores the resistance to external pH gradient stress in the old cardiomyocytes.

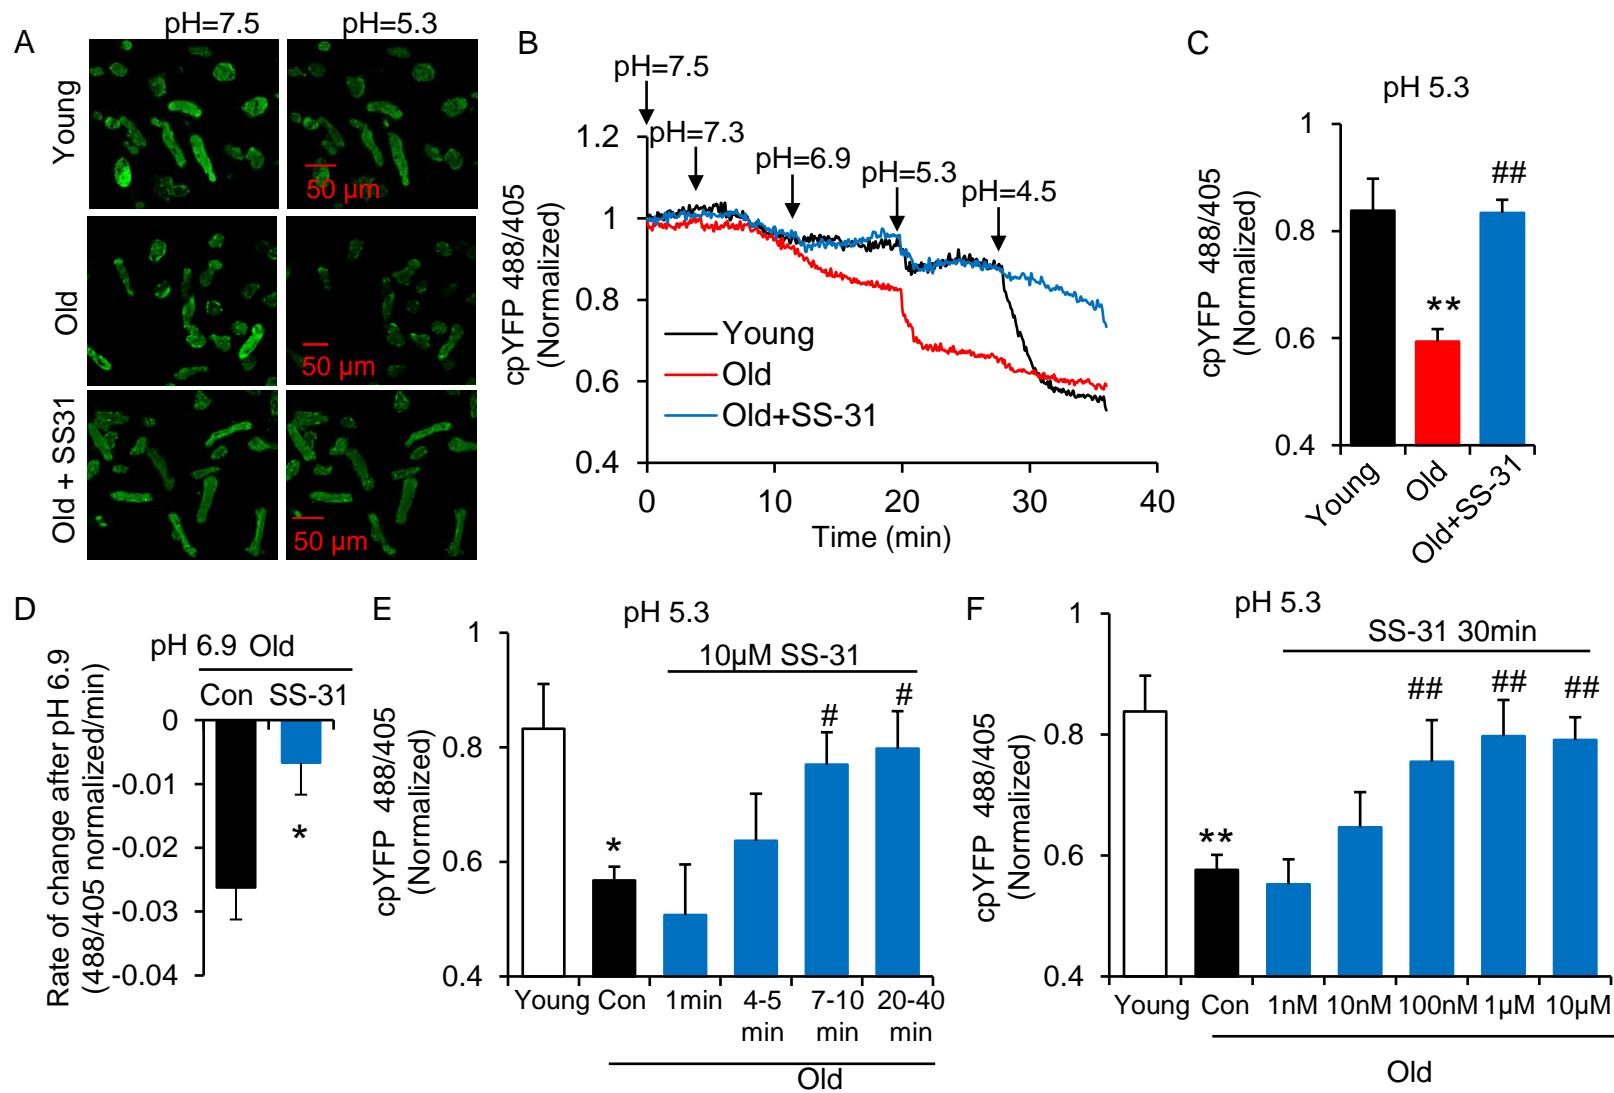



Fig. 3: ANT1 inhibitors restore resistance to proton leak in old cardiomyocytes.

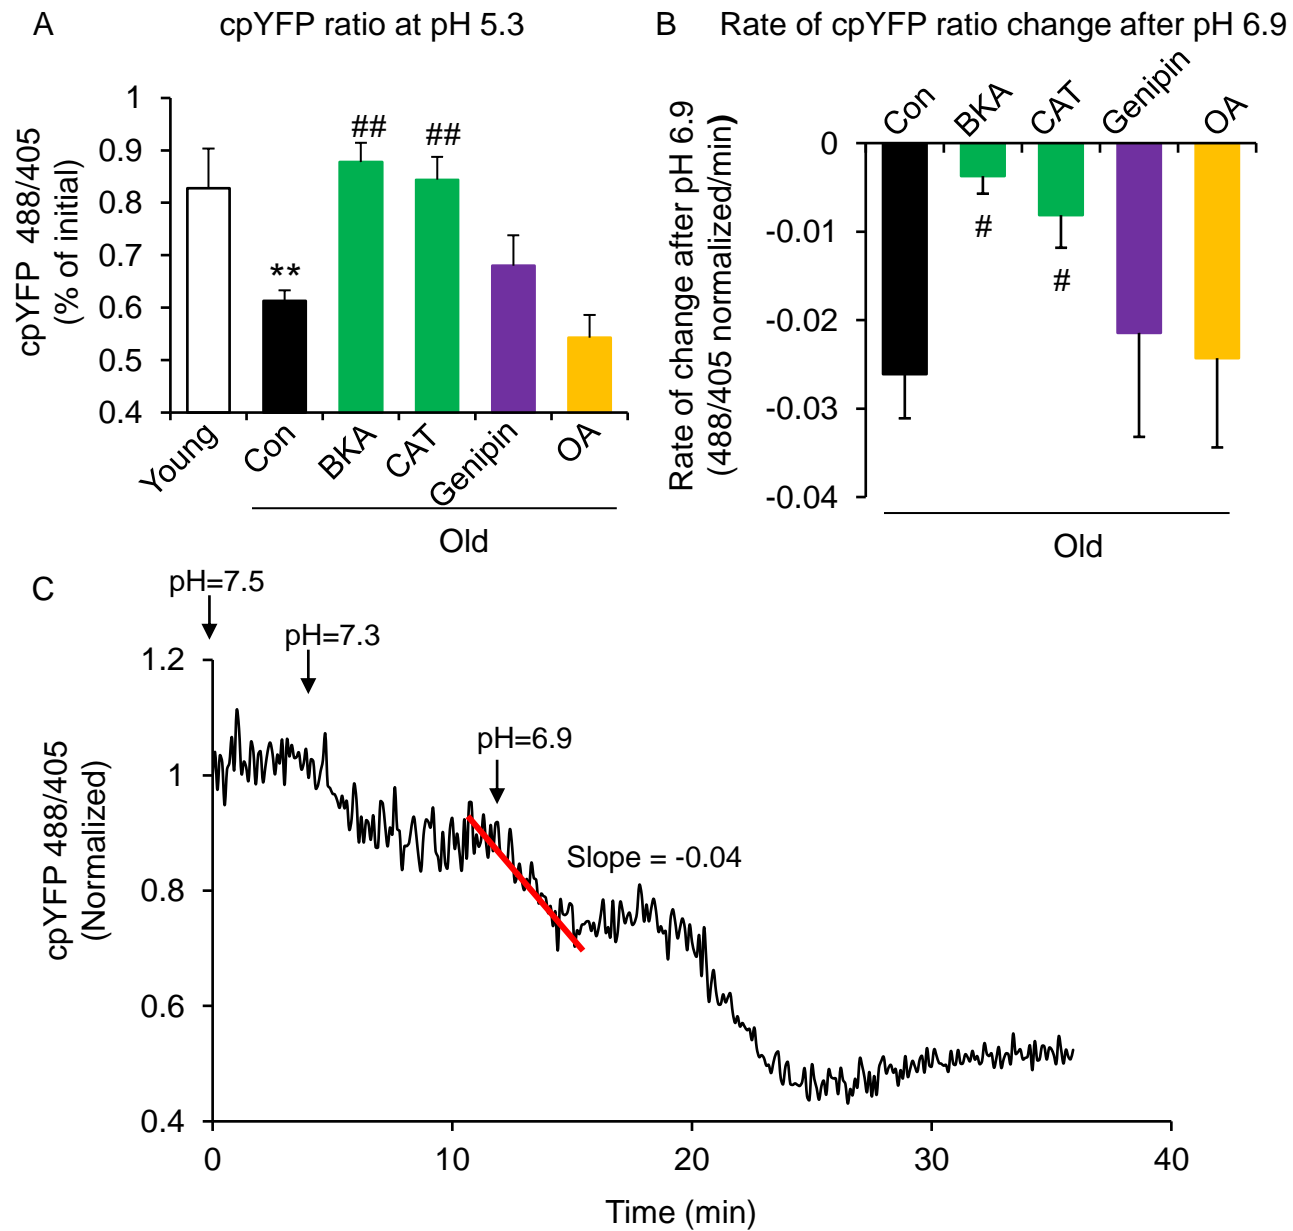

Fig. 4: SS-31 attenuates the excessive mitoflash activity in aged cardiomyocytes

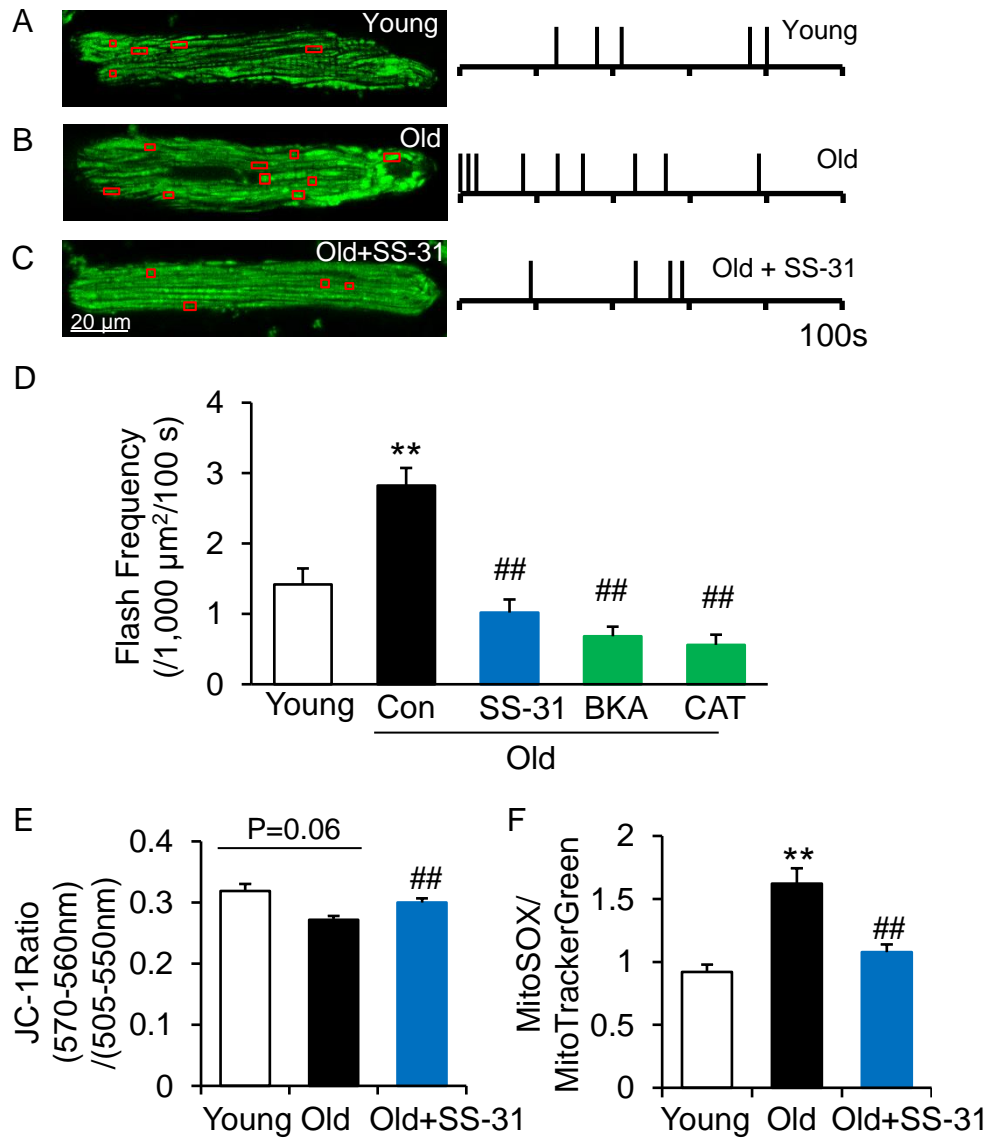

Fig. 5: SS-31 reverses the increased mPTP opening in aged cardiomyocytes.

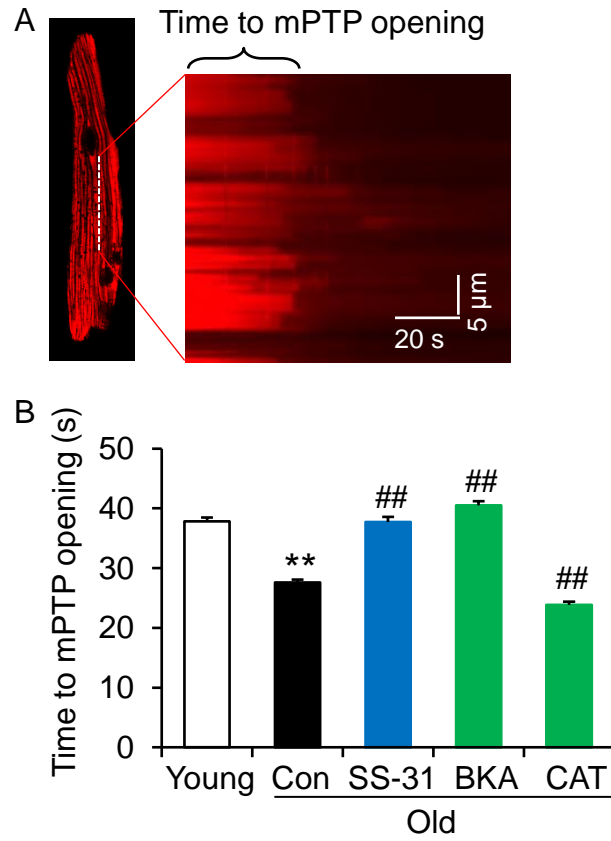

Fig. 6: SS31 associates directly with ANT1 and stabilizing the ATP synthasome

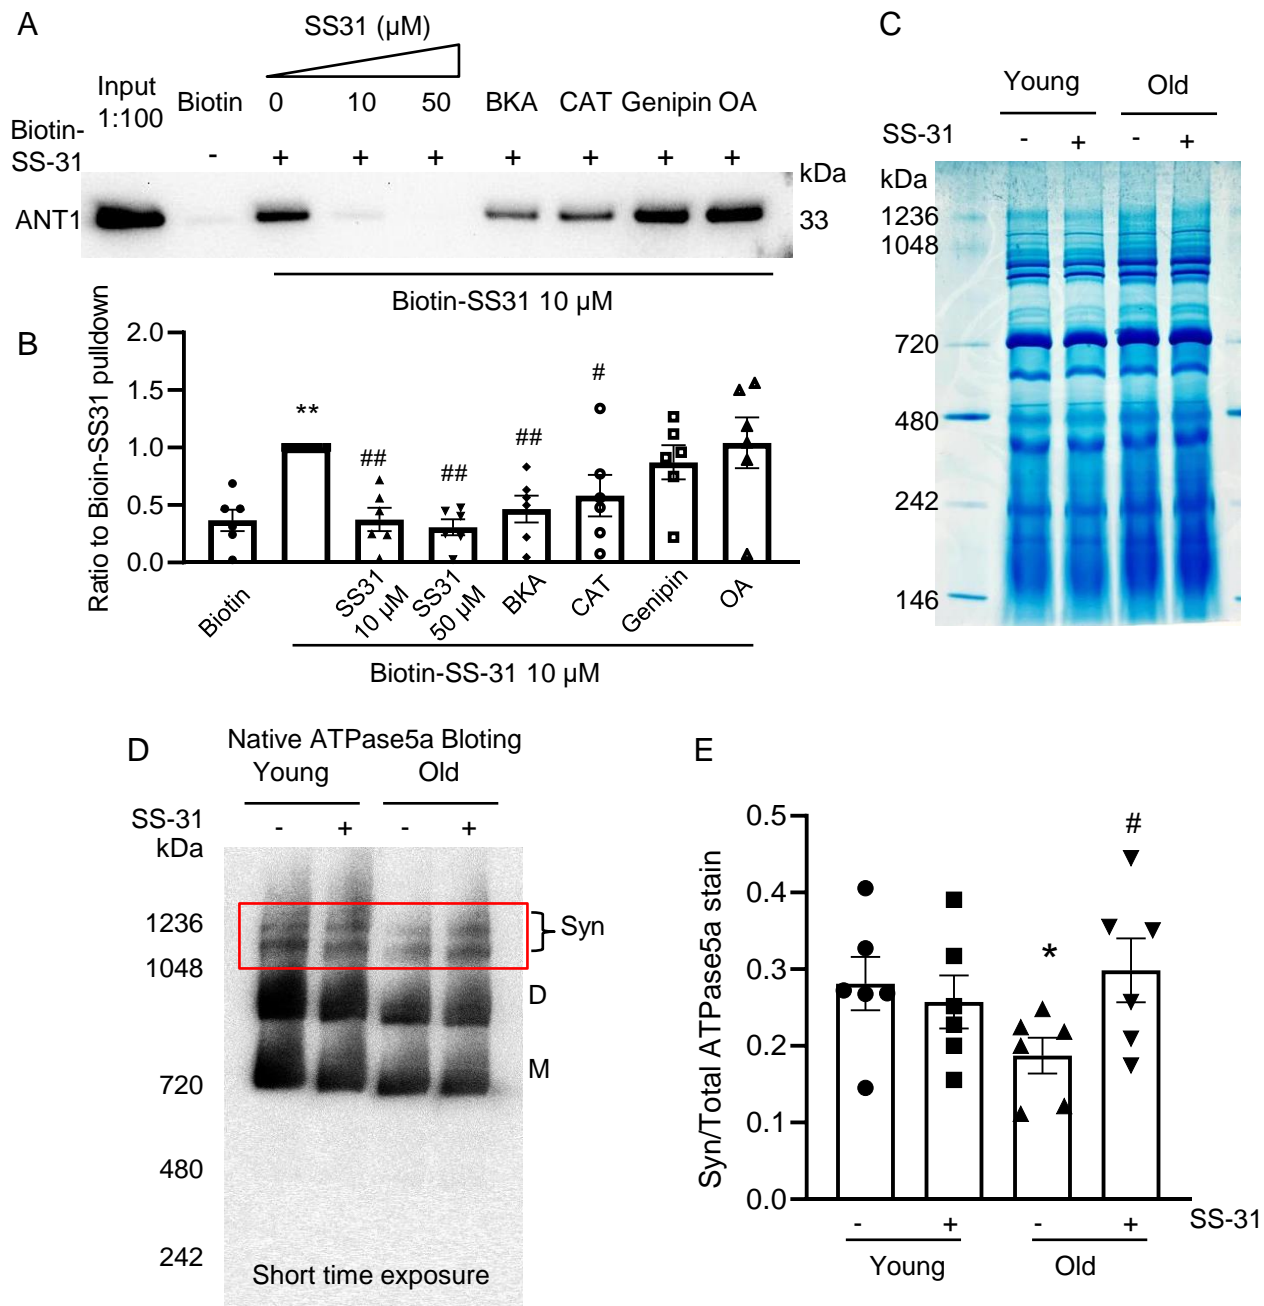

Fig. 7: Diagram of SS-31 prevent proton leak and rejuvenated mitochondrial function

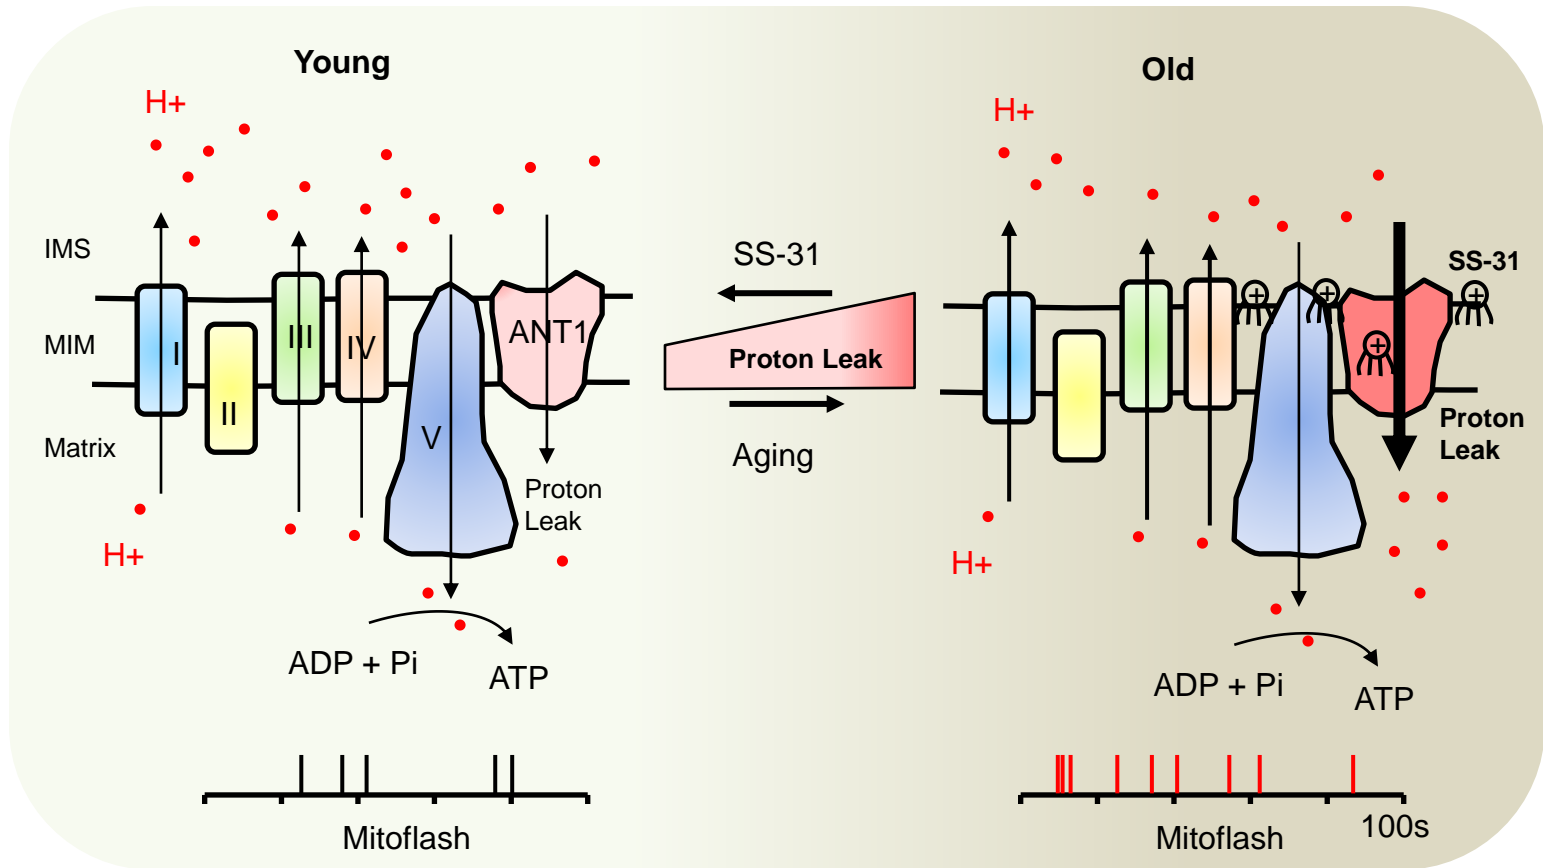

 SS-31

IMS: Intermembrane Space  
MIM: Mitochondrial Inner Membrane

Supplemental Fig. 1: SS-31 has minor effect on the respiration of young cardiomyocytes

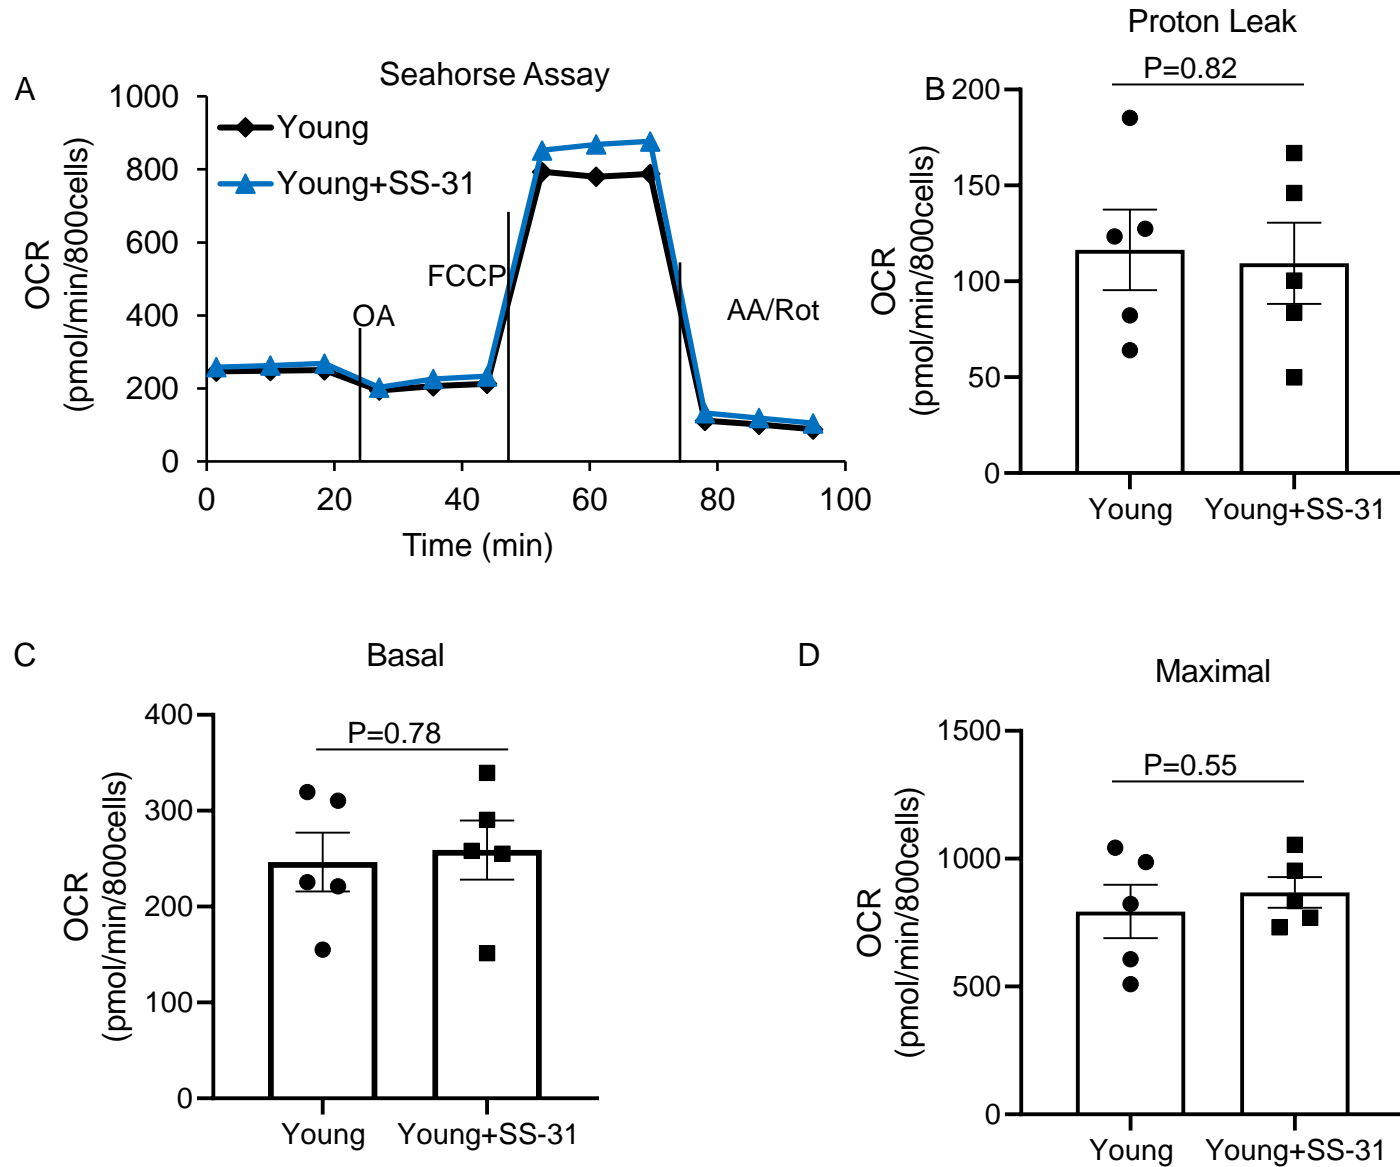

Supplemental Fig. 2: SS-31 dose dependently suppresses the mitochondrial proton leak

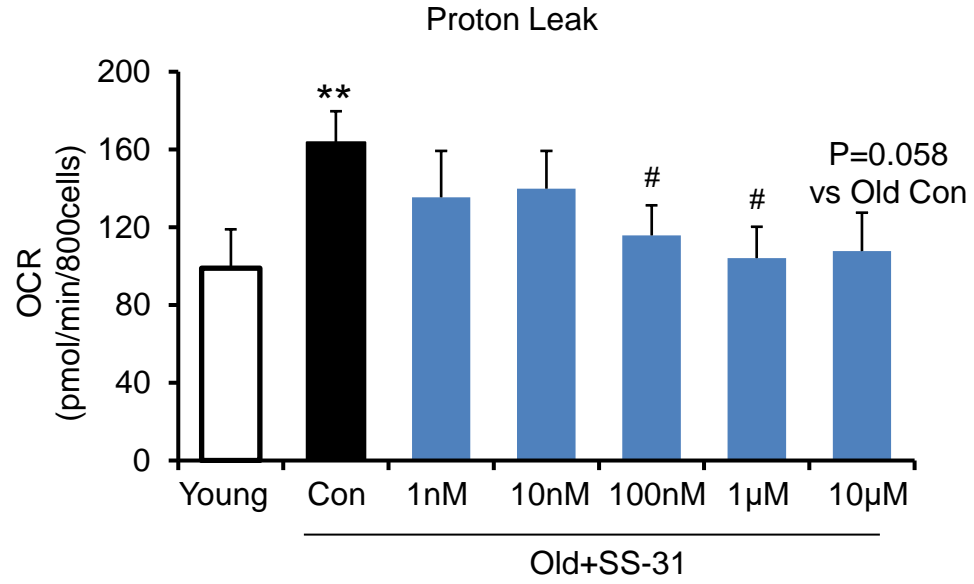

Supplemental Fig. 3: cpYFP fluorescent pH calibration

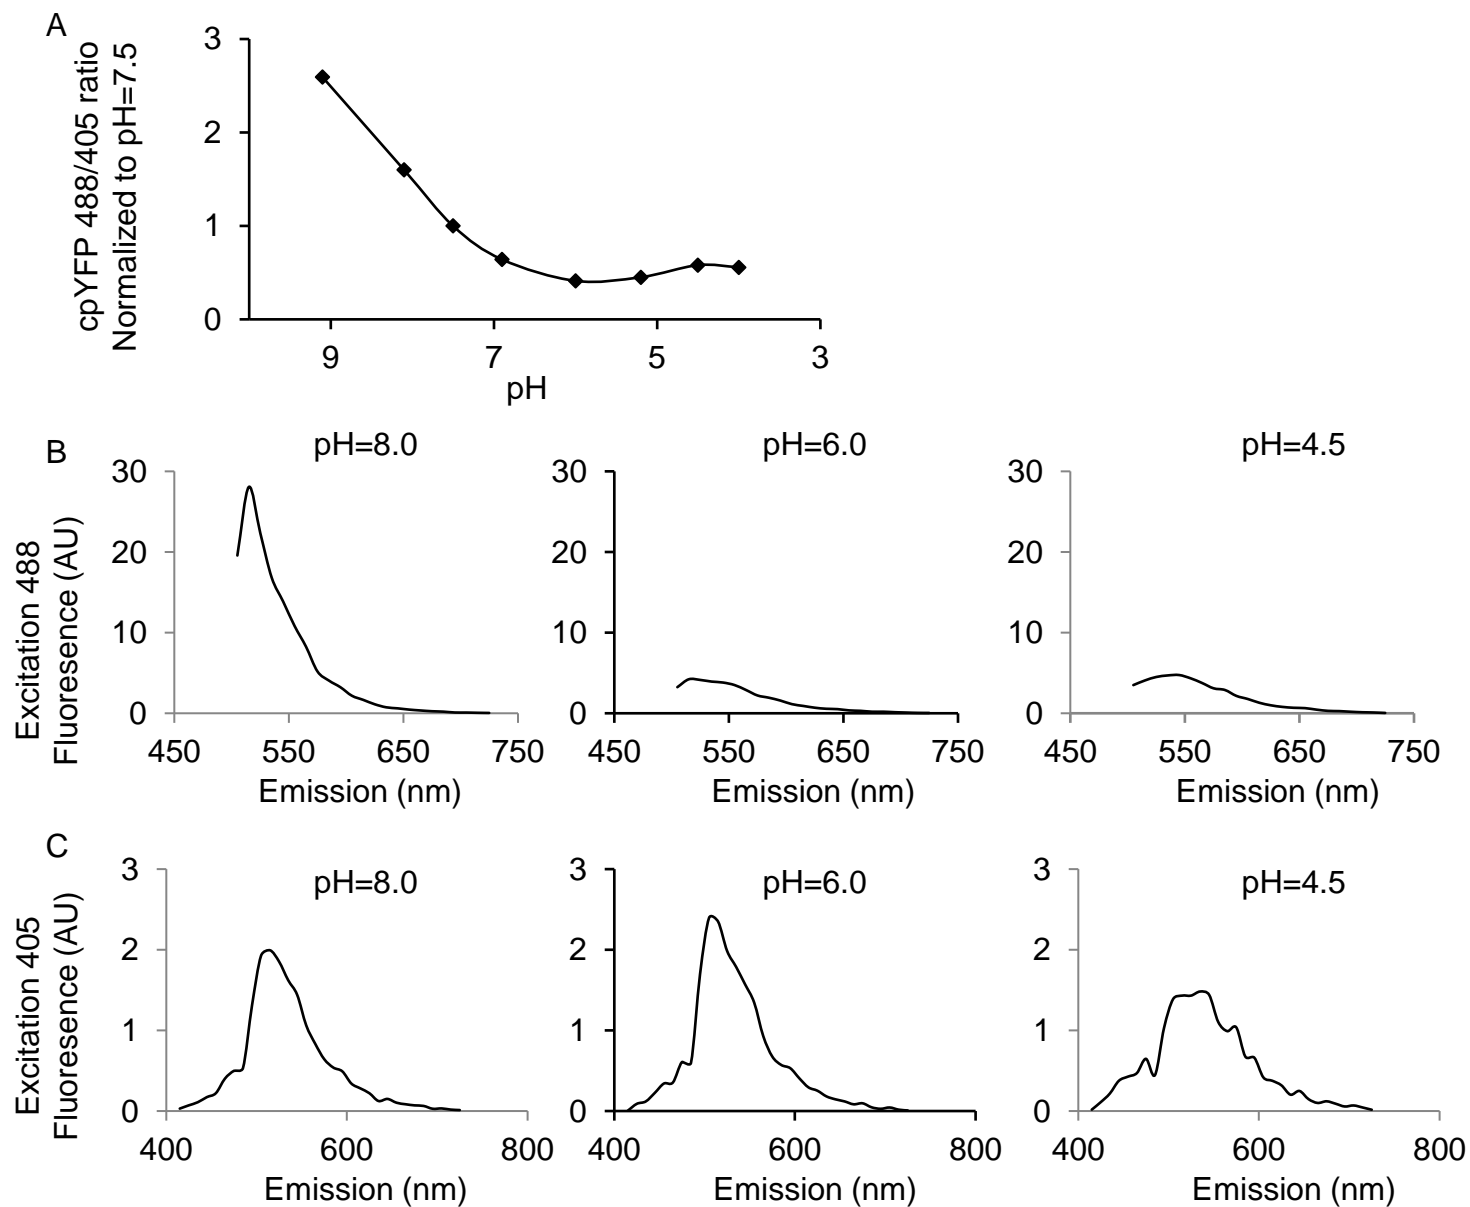



Supplemental Fig. 4: Aging effect on the proton leak proteins.

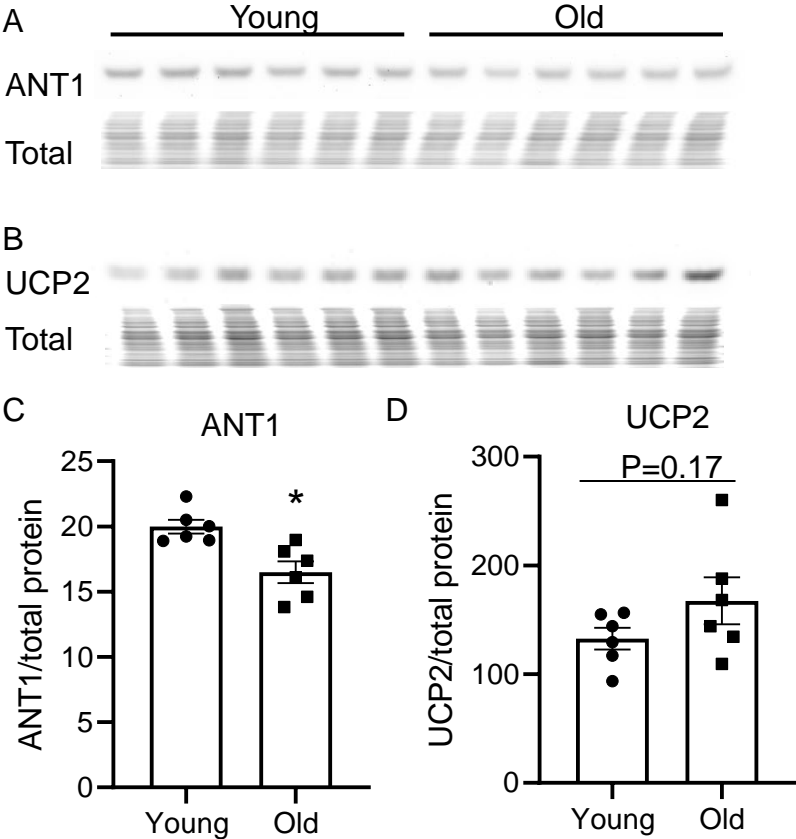

Supplemental Fig. 5: Increased mitochondrial flash in the aged intact heart.

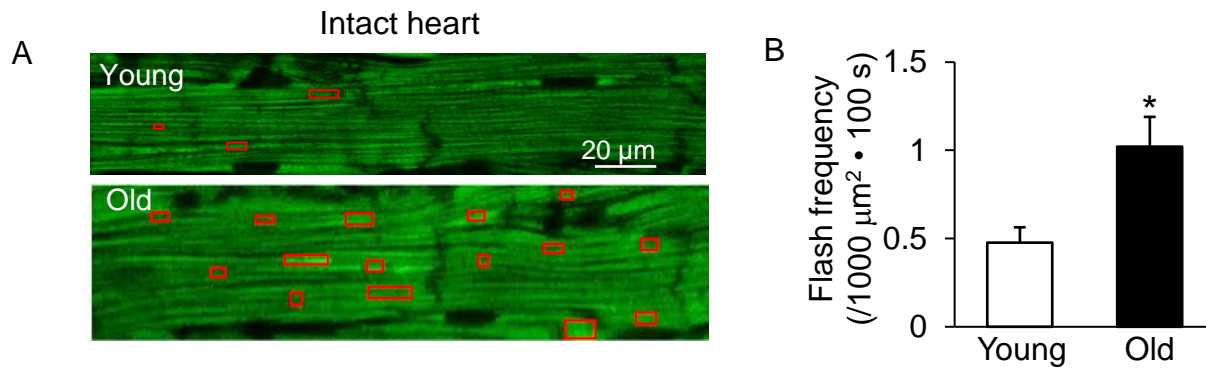

Supplemental Fig. 6: Silver stain of Biotin-SS31 pulldown

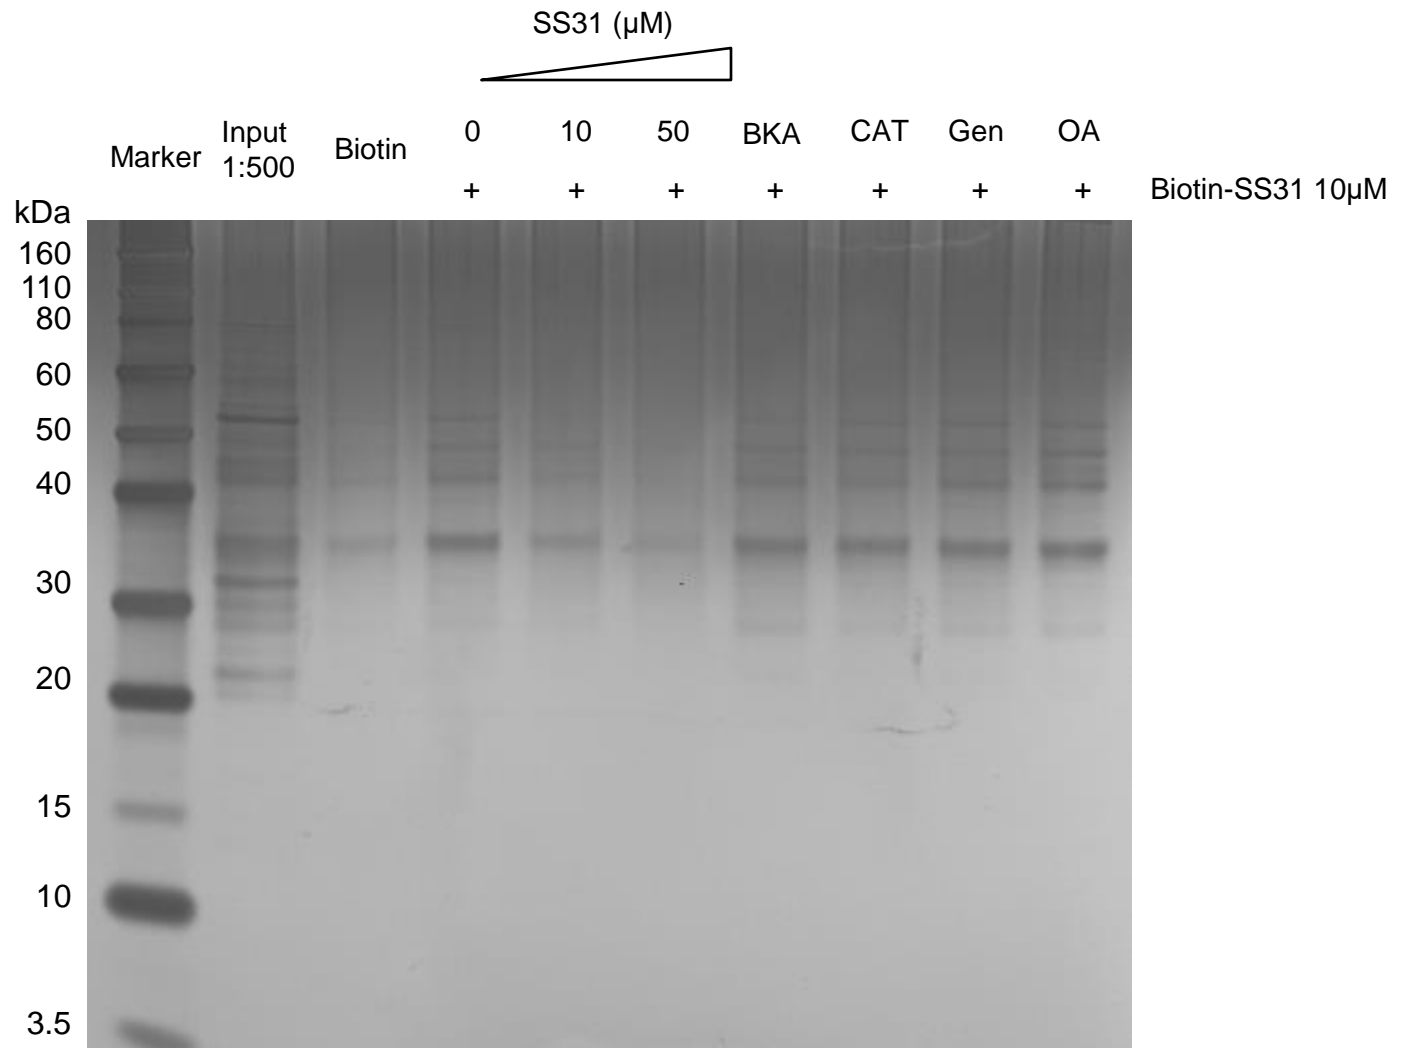

Source: http://biorxiv.org/content/10.1101/2020.01.02.893362v2.full.pdf
